1           **A robust phylogenomic timetree for biotechnologically and**  
2           **medically important fungi from Aspergillaceae (Eurotiomycetes,**  
3                                 **Ascomycota)**

4  
5       Jacob L. Steenwyk<sup>1</sup>, Xing-Xing Shen<sup>1</sup>, Abigail L. Lind<sup>2,3</sup>, Gustavo H. Goldman<sup>4</sup>, and Antonis  
6                                                               Rokas<sup>1,2,\*</sup>

7  
8           <sup>1</sup> Department of Biological Sciences, Vanderbilt University, Nashville, TN, 37235, USA

9           <sup>2</sup> Department of Biomedical Informatics, Vanderbilt University School of Medicine, Nashville,  
10                                                               Tennessee, United States of America

11           <sup>3</sup> Gladstone Institute for Data Science and Biotechnology, San Francisco, California, USA

12           <sup>4</sup> Departamento de Ciências Farmacêuticas, Faculdade de Ciências Farmacêuticas de Ribeirão  
13                                                               Prêto, Bloco Q, Universidade de São Paulo, São Paulo, Brazil

14  
15       \* Materials and correspondence: [antonis.rokas@vanderbilt.edu](mailto:antonis.rokas@vanderbilt.edu)

16  
17       **Running title:** Phylogenomics of Aspergillaceae

18       **Keywords:**   Incongruence, genomics, phylogenetics, Eurotiomycetes

19       **Abbreviations:**   NT, nucleotide; AA, amino acid; CI, confidence interval; RCV, relative  
20       composition variability; IC, internode certainty; GSF, gene support frequencies; GLS, gene-wise  
21       log-likelihood scores; DVMC, degree of violation of a molecular clock;

## 22 **Abstract**

23 The filamentous fungal family Aspergillaceae contains > 1,000 known species, mostly in the  
24 genera *Aspergillus* and *Penicillium*. Fungi in Aspergillaceae display a wide range of lifestyles,  
25 including several that are of relevance to human affairs. For example, several species are used as  
26 industrial workhorses, food fermenters, or platforms for drug discovery (e.g., *Aspergillus niger*,  
27 *Penicillium camemberti*), while others are dangerous human and plant pathogens (e.g.,  
28 *Aspergillus fumigatus*, *Penicillium digitatum*). Reconstructing the phylogeny and timeline of the  
29 family's diversification is the first step toward understanding how its diverse range of lifestyles  
30 evolved. To infer a robust phylogeny for Aspergillaceae and pinpoint poorly resolved branches  
31 and their likely underlying contributors, we used 81 genomes spanning the diversity of  
32 *Aspergillus* and *Penicillium* to construct a 1,668-gene data matrix. Phylogenies of the nucleotide  
33 and amino acid versions of this full data matrix were generated using three different maximum  
34 likelihood schemes (i.e., gene-partitioned, unpartitioned, and coalescence). We also used the  
35 same three schemes to infer phylogenies from five additional 834-gene data matrices constructed  
36 by subsampling the top 50% of genes according to different criteria associated with strong  
37 phylogenetic signal (alignment length, average bootstrap value, taxon completeness, treeness /  
38 relative composition variability, and number of variable sites). Examination of the topological  
39 agreement among these 36 phylogenies and measures of internode certainty identified 12 / 78  
40 (15.4%) bipartitions that were incongruent. Patterns of incongruence across these 12 bipartitions  
41 fell into three categories: (i) low levels of incongruence for 2 shallow bipartitions, most likely  
42 stemming from incomplete lineage sorting, (ii) high levels of incongruence for 3 shallow  
43 bipartitions, most likely stemming from hybridization or introgression (or very high levels of  
44 incomplete lineage sorting), and (iii) varying levels of incongruence for 7 deeper bipartitions,

45 most likely stemming from reconstruction artifacts associated with poor taxon sampling. Relaxed  
46 molecular clock analyses suggest that Aspergillaceae likely originated in the lower Cretaceous,  
47 125.1 (95% Confidence Interval (CI): 146.7 - 102.1) million years ago (mya), with the origins of  
48 the *Aspergillus* and *Penicillium* genera dating back to 84.3 mya (95% CI: 90.9 - 77.6) and 77.4  
49 mya (95% CI: 94.0 - 61.0), respectively. Our results provide a robust evolutionary and temporal  
50 framework for comparative genomic analyses in Aspergillaceae, while our general approach  
51 provides a widely applicable template for phylogenomic identification of resolved and  
52 contentious branches in densely genome-sequenced lineages across the tree of life.

53 The vast majority of the 1,062 described species from the family Aspergillaceae (phylum  
54 Ascomycota, class Eurotiomycetes, order Eurotiales)<sup>1</sup> belong to the genera *Aspergillus* (42.5%;  
55 451 / 1,062) and *Penicillium* (51.6%; 549 / 1,062)<sup>2,3</sup>. Fungi from Aspergillaceae exhibit diverse  
56 ecologies; for example, *Penicillium verrucosum* is widespread in cold climates but has yet to be  
57 isolated in the tropics<sup>4</sup>, whereas *Aspergillus nidulans* is able to grow at a wide range of  
58 temperatures but favors warmer temperatures<sup>5</sup>. Several representative species in the family are  
59 exploited by humans, while a number of others are harmful to humans or their activities<sup>6</sup>. For  
60 example, *Aspergillus oryzae* is used in the production of traditional Japanese foods including soy  
61 sauce, sake, and vinegar<sup>7,8</sup>, *Penicillium camemberti* and *Penicillium roqueforti* contribute to  
62 cheese production<sup>9,10</sup>, *Aspergillus niger* is used in the production of enzymes that are later used  
63 in starch processing, baking and brewing industries, in animal feed, and the paper industry<sup>11</sup>, and  
64 *Penicillium citrinum* produces the cholesterol lowering drug mevastatin, the world's first statin  
65 (Endo 2010). In contrast, *Aspergillus fumigatus* and *Aspergillus flavus* are pathogens, allergens,  
66 and mycotoxin producers<sup>13,14</sup> and *Penicillium expansum*, *Penicillium digitatum*, and *Penicillium*  
67 *italicum* are post-harvest pathogens of citrus fruits, stored grains, and other cereal crops<sup>15-17</sup>.  
68  
69 Much of the rich diversity of ecologies and wide impact on human affairs that Aspergillaceae  
70 exhibit has been attributed to the remarkable chemical diversity of secondary metabolites, small  
71 molecules that function as toxins, signaling molecules, and pigments, that organisms in this  
72 family produce<sup>18-20</sup>. For example, diminished global production of secondary metabolites in *A.*  
73 *nidulans* caused by knocking-out the master regulator of secondary metabolism, *laeA*, resulted in  
74 increased predation by the collembolan fungivore, *Folsomia candida*, which suggests that these  
75 compounds play defensive roles<sup>21</sup>. Other studies investigating single secondary metabolites have

76 shown that these small molecules often have biological activities that are either harmful or  
77 beneficial to human welfare. For example, the *A. fumigatus*-produced secondary metabolite  
78 gliotoxin is a potent virulence factor in cases of systemic mycosis in vertebrates<sup>22</sup>, and the *A.*  
79 *flavus*-produced secondary metabolite aflatoxin is among the most toxic and carcinogenic  
80 naturally occurring compounds<sup>19,23</sup>. In contrast, other secondary metabolites are mainstay  
81 antibiotics and pharmaceuticals; for example, the *Penicillium chrysogenum*-produced penicillin  
82 is among the world's most widely used antibiotics<sup>24–26</sup> and the *P. citrinum*-produced cholesterol  
83 lowering statins are consistently among the world's blockbuster drugs<sup>12</sup>.

84  
85 Understanding the evolution of the diverse ecological lifestyles exhibited by Aspergillaceae  
86 members as well as the family's remarkable chemodiversity requires a robust phylogenetic  
87 framework. To date, most molecular phylogenies of the family Aspergillaceae are derived from  
88 single or few genes and have yielded conflicting results. For example, there is little consensus on  
89 whether the genus *Aspergillus* is monophyletic or if it includes species from other genera such as  
90 *Penicillium*<sup>27,28</sup>. Furthermore, studies using genome-scale amounts of data, which could have the  
91 power to resolve evolutionary relationships and identify underlying causes of conflict<sup>29,30</sup>, have  
92 so far tended to use a small subset of fungi from either *Aspergillus* or *Penicillium*<sup>31–33</sup>.

93 Additionally, these genome-scale studies typically build one phylogeny and, based on the high  
94 clade support values (e.g., bootstrap values) obtained, infer or assume that the topology obtained  
95 is highly accurate<sup>31–34</sup>.

96  
97 In very recent years, several phylogenomic analyses have shown that incongruence, the presence  
98 of topological conflict between different data sets or analyses, is widespread<sup>29,35–37</sup>, and that

99 certain branches of the tree of life can be very challenging to resolve, even with genome-scale  
100 amounts of data<sup>38-42</sup>. For example, analyses of the currently available genome-scale amounts of  
101 data have not resolved the placement of the budding yeast family Ascoideaceae in the fungal  
102 subphylum Saccharomycotina (phylum: Ascomycota)<sup>38,42,43</sup>. Comparison of the topologies  
103 inferred in previous phylogenomic studies in Aspergillaceae<sup>31-34</sup> suggests the presence of  
104 incongruence (Figure S1). For example, some studies have reported section *Nidulantes* to be the  
105 sister group to section *Nigri*<sup>31</sup>, whereas other studies have placed it as the sister group to  
106 *Ochraceorosei*<sup>33</sup> (Figure S1).

107

108 To systematically evaluate the evolutionary relationships among Aspergillaceae and identify  
109 instances of incongruence, we used the genome sequences of 81 fungi from Aspergillaceae  
110 spanning 4 genera, 24 sections within *Aspergillus* and *Penicillium*, and 12 outgroup fungi to  
111 construct nucleotide (NT) and amino acid (AA) versions of a 1,668-gene data matrix. Using  
112 three different maximum likelihood schemes (i.e., gene-partitioned, unpartitioned, and  
113 coalescence), we inferred phylogenies from the 1,668-gene data matrix as well as from five  
114 additional 834-gene data matrices derived from the top 50% of genes harboring strong  
115 phylogenetic signal according to five different criteria (alignment length, average bootstrap  
116 value, taxon completeness, treeness / relative composition variability, and number of variable  
117 sites). Comparisons of these phylogenies coupled with complementary measures of internode  
118 certainty<sup>29,44,45</sup> identified 12 / 78 (15.4%) incongruent bipartitions in the phylogeny of  
119 Aspergillaceae. These cases of incongruence can be grouped into three categories: (i) 2 shallow  
120 bipartitions with low levels of incongruence likely driven by incomplete lineage sorting, (ii) 3  
121 shallow bipartitions with high levels of incongruence likely driven by hybridization or

122 introgression (or very high levels of incomplete lineage sorting), and (iii) 7 deeper bipartitions  
123 with varying levels of incongruence likely driven by reconstruction artifacts likely linked with  
124 poor taxon sampling. We also estimated divergence times across Aspergillaceae using relaxed  
125 molecular clock analyses. Our results suggest Aspergillaceae originated in the lower Cretaceous,  
126 125.1 (95% Confidence Interval (CI): 146.7 - 102.1) million years ago (mya), and that  
127 *Aspergillus* and *Penicillium* originated 84.3 mya (95% CI: 90.9 - 77.6) and 77.4 mya (95% CI:  
128 94.0 - 61.0), respectively. We believe this phylogeny and timetree provides a state-of-the-art  
129 platform for comparative genomic, ecological, and chemodiversity studies in this ecologically  
130 diverse and biotechnologically and medically significant family of filamentous fungi.

## 131 **Methods**

132

### 133 **Genome sequencing and assembly**

134 Mycelia were grown on potato dextrose agar for 72 hours before lyophilization. Lyophilized  
135 mycelia were lysed by grinding in liquid nitrogen and suspension in extraction buffer (100 mM  
136 Tris-HCl pH 8, 250 mM NaCl, 50 mM EDTA, and 1% SDS). Genomic DNA was isolated from  
137 the lysate with a phenol/chloroform extraction followed by an ethanol precipitation.

138

139 DNA was sequenced with both paired-end and mate-pair strategies to generate a high-quality  
140 genome assembly. Paired-end libraries and Mate-pair libraries were constructed at the Genomics  
141 Services Lab at HudsonAlpha (Huntsville, Alabama) and sequenced on an Illumina HiSeq X  
142 sequencer. Paired-end libraries were constructed with the Illumina TruSeq DNA kit, and mate-  
143 pair libraries were constructed with the Illumina Nextera Mate Pair Library kit targeting an insert  
144 size of 4 Kb. In total, 63 million paired-end reads and 105 million mate-pair reads were  
145 generated.

146

147 The *A. delacroixii* genome was assembled using the iWGS pipeline<sup>46</sup>. Paired-end and mate-pair  
148 reads were assembled with SPADES, version 3.6.2<sup>47</sup>, using optimal k-mer lengths chosen using  
149 KMERGENIE, version 1.6982<sup>48</sup> and evaluated with QUAST, version 3.2<sup>49</sup>. The resulting assembly  
150 is 33.8 MB in size with an N50 of 939 Kb.

151



## 152 **Data collection and quality assessment**

153 To collect a comprehensive set of genomes representative of Aspergillaceae, we used  
154 ‘Aspergillaceae’ as a search term in NCBI’s Taxonomy Browser and downloaded a  
155 representative genome from every species that had a sequenced genome as of February 5<sup>th</sup> 2018.  
156 We next confirmed that each species belonged to Aspergillaceae according to previous literature  
157 reports<sup>31,50</sup>. Altogether, 80 publicly available genomes and 1 newly sequenced genome spanning  
158 5 genera (45 *Aspergillus* species; 33 *Penicillium* species; one *Xeromyces* species; one *Monascus*  
159 species; and one *Penicillioopsis* species) from the family Aspergillaceae were collected (File S1).  
160 We also retrieved an additional 12 fungal genomes from representative species in the order  
161 Eurotiales but outside the family Aspergillaceae to use as outgroups.

162  
163 To determine if the genomes contained gene sets of sufficient quality for use in phylogenomic  
164 analyses, we examined their gene set completeness using Benchmarking Universal Single-Copy  
165 Orthologs (BUSCO), version 2.0.1<sup>51</sup> (Figure S2). In brief, BUSCO uses a consensus sequence  
166 built from hidden Markov models derived from 50 different fungal species using HMMER,  
167 version 3.1b2<sup>52</sup> as a query in tBLASTN<sup>53,54</sup> to search an individual genome for 3,156 predefined  
168 orthologs (referred to as BUSCO genes) from the Pezizomycotina database (creation date: 02-13-  
169 2016) available from ORTHODB, version 9<sup>55</sup>. To determine the copy number and completeness  
170 of each BUSCO gene in a genome, gene structure is predicted using AUGUSTUS, version  
171 2.5.5<sup>56</sup>, from the nucleotide coordinates of putative genes identified using BLAST and then  
172 aligned to the HMM alignment of the same BUSCO gene. Genes are considered “single copy” if  
173 there is only one complete predicted gene present in the genome, “duplicated” if there are two or  
174 more complete predicted genes for one BUSCO gene, “fragmented” if the predicted gene is

175 shorter than 95% of the aligned sequence lengths from the 50 different fungal species, and  
176 “missing” if there is no predicted gene.

177

## 178 **Phylogenomic data matrix construction**

179 In addition to their utility as a measure of genome completeness, BUSCO genes have also proven  
180 to be useful markers for phylogenomic inference<sup>57</sup>, and have been successfully used in  
181 phylogenomic studies of clades spanning the tree of life, such as birds<sup>58</sup>, insects<sup>59</sup>, and budding  
182 yeasts<sup>38</sup>. To infer evolutionary relationships, we constructed nucleotide (NT) and amino acid  
183 (AA) versions of a data matrix comprised of the aligned and trimmed sequences of numerous  
184 BUSCO genes (Figure S3). To construct this data matrix, we first used the BUSCO output  
185 summary files to identify orthologous single copy BUSCO genes with > 50% taxon-occupancy  
186 (i.e., greater than 47 / 93 taxa have the BUSCO gene present in their genome); 3,138 (99.4%)  
187 BUSCO genes met this criterion. For each BUSCO gene, we next created individual AA fasta  
188 files by combining sequences across all taxa that have the BUSCO gene present. For each gene  
189 individually, we aligned the sequences in the AA fasta file using MAFFT, version 7.294b<sup>60</sup>, with  
190 the BLOSUM62 matrix of substitutions<sup>61</sup>, a gap penalty of 1.0, 1,000 maximum iterations, and  
191 the ‘genafpair’ parameter. To create a codon-based alignment, we used a custom PYTHON,  
192 version 3.5.2 (<https://www.python.org/>), script using BIOPYTHON, version 1.7<sup>62</sup>, to thread codons  
193 onto the AA alignment. The NT and AA sequences were then individually trimmed using  
194 TRIMAL, version 1.4<sup>63</sup>, with the ‘automated1’ parameter. We next removed BUSCO genes  
195 whose sequence lengths were less than 50% of the untrimmed length in either the NT or AA  
196 sequences resulting in 1,773 (56.2%) BUSCO genes. Lastly, we removed BUSCO genes whose  
197 trimmed sequence lengths were too short (defined as genes whose alignment length was less than

198 or equal to 167 AAs and 501 NTs), resulting in 1,668 (52.9%) BUSCO genes. The NT and AA  
199 alignments of these 1,668 BUSCO genes were then concatenated into the full 1,668-gene NT and  
200 AA versions of the phylogenomic data matrix.

201  
202 To examine the stability of inferred relationships across all taxa, we constructed additional NT  
203 and AA data matrices by subsampling genes from the 1,668-gene data matrix that harbor  
204 signatures of strong phylogenetic signal. More specifically, we used 5 measures associated with  
205 strong phylogenetic signal<sup>64</sup> to create 5 additional data matrices (1 data matrix per measure)  
206 comprised of the top scoring 834 (50%) genes for NTs and AAs (Figure S4). These five  
207 measures were: alignment length, average bootstrap value, taxon completeness, treeness /  
208 relative composition variability (RCV)<sup>65</sup>, and the number of variable sites. We calculated each  
209 measure with custom PYTHON scripts using BIOPYTHON. Treeness / RCV was calculated using  
210 the following formula:

$$211 \quad \frac{Treeness}{RCV} = \frac{\sum_{u=1}^b l_u / l_t}{\sum_{i=1}^c \sum_{j=1}^n \frac{|c_{ij} - \bar{c}_i|}{s \cdot n}}$$

212 where  $l_u$  refers to the internal branch length of the  $u$ th branch (of  $b$  internal branches),  $l_t$  refers to  
213 total tree length,  $c$  is the number of different characters per sequence type (4 for nucleotides and  
214 20 for amino acids),  $n$  is the number of taxa in the alignment,  $c_{ij}$  refers to the number of  $i$ th  $c$   
215 characters for the  $j$ th taxon,  $\bar{c}_i$  refers to the average number of the  $i$ th  $c$  character across  $n$  taxa,  
216 and  $s$  refers to the total number of sites in the alignment. Altogether, we constructed a total of 12  
217 data matrices (one 1,668-gene NT data matrix, one 1,668-gene AA data matrix, five NT  
218 subsample data matrices, and five AA subsample data matrices).

219

## 220 **Maximum likelihood phylogenetic analyses**

221 We implemented a maximum likelihood framework to infer evolutionary relationships among  
222 taxa for each of the 1,668 single genes and each of the 12 data matrices separately. For  
223 inferences made using either the 1,668- or 834-gene data matrices, we used three different  
224 analytical schemes: concatenation with gene-based partitioning, concatenation without  
225 partitioning, and gene-based coalescence<sup>30,66–68</sup>. All phylogenetic trees were built using IQ-  
226 TREE, version 1.6.1<sup>69</sup>. In each case, we first determined the best model for each single gene or  
227 partition using the “-m TEST” parameter, which automatically estimates the best fitting model of  
228 substitutions according to their Bayesian Information Criterion values for either NTs or AAs<sup>70</sup>.  
229 Because we were unsure if downstream analyses may include the use of RAXML<sup>71</sup>, we restricted  
230 the models tested and used to those shared by RAXML<sup>71</sup> and IQ-TREE by using the “-mset”  
231 parameter.

232  
233 We first examined the inferred best fitting models across all single gene trees. Among NT genes,  
234 the best fitting model for 1,643 genes was a general time reversible model with unequal rates and  
235 unequal base frequencies with discrete gamma models, “GTR+G4”<sup>72–74</sup>, and for the remaining 25  
236 genes was a general time reversible model with invariable sites plus discrete gamma models,  
237 “GTR+I+G4”<sup>74,75</sup> (Figure S5a). Among AA genes, the best fitting model for 643 genes was the  
238 JTT model with invariable sites plus discrete gamma models, “JTT+I+G4”<sup>75,76</sup>, for 362 genes  
239 was the LG model with invariable sites and discrete gamma models, “LG+I+G4”<sup>75,77</sup>, for 225  
240 genes was the JTT model with invariable sites, empirical AA frequencies, and discrete gamma  
241 models “JTT+F+I+G4”<sup>75,76</sup>, and for 153 genes was the JTTDCMut model with invariable sites  
242 and discrete gamma models, “JTTDCMut+I+G4”<sup>75,78</sup> (Figure S5b).

243

244 We used IQ-TREE for downstream analysis because a recent study using diverse empirical  
245 phylogenomic data matrices showed that it is a top-performing software<sup>79</sup> as well as because IQ-  
246 TREE's gene partitioning scheme can account for different models of rate heterogeneity per  
247 gene<sup>80</sup>.

248

249 To determine the phylogeny of Aspergillaceae using a partitioned scheme where each gene has  
250 its own model of sequence substitution and rate heterogeneity parameters, we created an  
251 additional input file describing these and gene boundary parameters. More specifically, we  
252 created a nexus-style partition file that was used as input with the "-spp" parameter<sup>80</sup>. To  
253 increase the number of candidate trees used during maximum likelihood search, we set the "-  
254 nbest" parameter to 10. Lastly, we conducted 5 independent searches for the maximum  
255 likelihood topology using 5 distinct seeds specified with the "-seed" parameter and chose the  
256 search with the best log-likelihood score. We used the phylogeny inferred using a partitioned  
257 scheme on the full NT data matrix as the reference one for all subsequent comparisons (Figure  
258 1).

259

260 To determine the phylogeny of Aspergillaceae using a non-partitioned scheme, we used all the  
261 same parameters as above; the only difference was that we used a single model of sequence  
262 substitution and rate heterogeneity parameters across the entire matrix. The most appropriate  
263 single model was determined by counting which best fitting model was most commonly  
264 observed across single gene trees. The most commonly observed model was  
265 "GTR+F+I+G4"<sup>75,81</sup>, which was favored in 1,643 / 1,668 (98.5%) of single genes, and

266 “JTT+I+G4”<sup>75,76</sup>, which was favored in 643 / 1,668 (38.5%) of single genes, for NTs and AAs,  
267 respectively, (Figure S5). In each analysis, the chosen model was specified using the “-m”  
268 parameter.

269

270 To determine the phylogeny of Aspergillaceae using coalescence, a method that estimates  
271 species phylogeny from single gene trees under the multi-species coalescent<sup>67</sup>, we combined all  
272 NEWICK<sup>82,83</sup> formatted single gene trees inferred using their best fitting models into a single file.  
273 The resulting file was used as input to ASTRAL-II, version 4.10.12<sup>68</sup> with default parameters.

274

275 To evaluate support for single gene trees and for the reference phylogeny (Figure 1), we used an  
276 ultrafast bootstrap approximation approach (UFBoot)<sup>84</sup>. UFBoot first generates bootstrap  
277 alignments and creates an initial set of trees to use as a null distribution of starting trees. UFBoot  
278 then uses quartet puzzling and the NNI algorithm<sup>85,86</sup> to sample the local maxima and their  
279 neighborhoods in tree space while reducing run-time by re-estimating log-likelihood threshold  
280 values to ensure only trees with sufficiently high log-likelihood values are investigated. If a new  
281 tree exceeds the log-likelihood minimum, which is adaptively estimated based on the number of  
282 trees encountered and the number of iterations performed by the quartet puzzling and NNI  
283 algorithm, a resampling estimated log-likelihood score<sup>87,88</sup> is determined for the new tree. If the  
284 resampling estimated log-likelihood score is better than the previous tree, the previous tree is  
285 replaced with the new tree for the particular bootstrap alignment. Ultimately, this methodology is  
286 3.1-10.2 times faster than rapid bootstrap support<sup>89</sup>, is robust to moderate model violations, and,  
287 most importantly, generates results that are unbiased compared to classic bootstrapping  
288 techniques<sup>84,90</sup>. Thus, this method allows for a fast and accurate alternative to the classic

289 bootstrapping approach. To implement UFBoot for the NT 1,668-gene data matrix and single  
290 gene trees, we used the “-bb” option in IQ-TREE with 5,000 and 2,000 ultrafast bootstrap  
291 replicates, respectively.

292

### 293 **Evaluating topological support**

294 To identify and quantify incongruence, we used two approaches. In the first approach, we  
295 compared the 36 topologies inferred from the full 1,668-gene NT and AA data matrices and five  
296 additional 834-gene data matrices (constructed by selecting the genes that have the highest  
297 scores in five measures previously shown to be associated with strong phylogenetic signal; see  
298 above) using three different maximum likelihood schemes (i.e., gene partitioned, non-  
299 partitioned, coalescence) and identified all incongruent bipartitions between the reference  
300 phylogeny (Figure 1) and the other 35. In the second approach, we scrutinized each bipartition in  
301 the reference phylogeny using measures of internode certainty (IC) measures for complete and  
302 partial single gene trees<sup>29,44,45</sup>. To better understand single gene support among conflicting  
303 bipartitions, we calculated gene-wise log-likelihood scores (GLS)<sup>42</sup> and gene support frequencies  
304 (GSF) for the reference and alternative topologies at conflicting bipartitions.

305

#### 306 *Identifying internodes with conflict across subsampled data matrices*

307 To identify incongruent bipartitions between the reference phylogeny and the other 35  
308 phylogenies, we first included the 36 generated phylogenetic trees into a single file. We next  
309 evaluated the support of all bipartitions in the reference topology among the other 35  
310 phylogenies using the “-z” option in RAxML. Any bipartition in the reference phylogeny that  
311 was not present in the rest was considered incongruent; each conflicting bipartition was

312 identified through manual examination of the conflicting phylogenies. To determine if sequence  
313 type, subsampling method, or maximum likelihood scheme was contributing to differences in  
314 observed topologies among conflicting internodes, we conducted multiple correspondence  
315 analysis of these features among the 36 phylogenies and visualized results using the R, version  
316 3.3.2<sup>91</sup>, packages FACTOMINER, version 1.40<sup>92</sup> and FACTOEXTRA, version 1.0.5<sup>93</sup>.

317

### 318 *Identifying internodes with conflict across the 1,668 gene trees*

319 To examine the presence and degree of support for bipartitions that conflict with the bipartitions  
320 in a given phylogeny, we calculated the internode certainty<sup>29,44,45,94</sup> of all internodes in the  
321 reference phylogeny (Figure 1) using the 1,668 gene trees as input. In general, IC scores near 0  
322 indicate that there is near-equal support for an alternative, conflicting bipartition among a set of  
323 trees compared to a given bipartition present in the reference topology, which is indicative of  
324 high conflict. Therefore, we investigated incongruence in all internodes in the reference  
325 phylogeny (Figure 1) that exhibited IC scores lower than 0.1. To calculate IC values for each  
326 bipartition for the reference phylogeny, we created a file with all 1,668 complete and partial  
327 single gene trees. The resulting file of gene trees, specified with the “-z” parameter in RAXML,  
328 were used to calculate IC values using the “-f i” argument. The topology was specified with the  
329 “-t” parameter. Lastly, we used the Lossless corrected IC scoring scheme, which corrects for  
330 variation in taxon number across single gene trees<sup>44</sup>. We also used these IC values to inform  
331 which data type (NT or AA) provided the strongest signal for the given set of taxa and  
332 sequences. We observed that NTs consistently exhibited higher IC scores than AAs (hence our  
333 decision to use the topology inferred from the full NT data matrix using a gene-partitioned  
334 scheme – shown in Figure 1 – as the ‘reference’ topology in all downstream analyses).



335

336 *Examining gene-wise log-likelihood scores for incongruent internodes*

337 To determine the per gene distribution of phylogenetic signal supporting a bipartition in the  
338 reference phylogeny or a conflicting bipartition, we calculated gene-wise log-likelihood scores  
339 (GLS)<sup>42</sup> using the NT data matrix. We chose to calculate GLS using the NT data matrix because  
340 distributions of IC values from phylogenies inferred using NTs had consistently higher IC values  
341 across schemes and data matrices (Figure S6). To do so, we used functions available in IQ-  
342 TREE. More specifically, we inputted a phylogeny with the reference or alternative topology  
343 using the “-te” parameter and informed IQ-TREE of gene boundaries, their corresponding  
344 models, and optimal rate heterogeneity parameters in the full 1,668-gene data matrix using the “-  
345 spp” parameter. Lastly, we specified that partition log-likelihoods be outputted using the “-wpl”  
346 parameter. To determine if a gene provided greater support for the reference or alternative  
347 bipartition, we calculated the difference in GLS ( $\Delta\text{GLS}$ ) using the following formula:

348 
$$\Delta\text{GLS}_i = \ln L(G_i)_{ref} - \ln L(G_i)_{alt}$$

349 where  $\ln L(G_i)_{ref}$  and  $\ln L(G_i)_{alt}$  represent the log-likelihood values for the reference and  
350 alternative topologies for gene  $G_i$ . Thus, values greater than 0 reflect genes in favor of the  
351 reference bipartition, values lower than 0 reflect genes in favor of the alternative bipartition, and  
352 values of 0 reflect equal support between the reference and alternative bipartitions.

353

354 *Calculating gene support frequencies for reference and conflicting bipartitions*

355 We next examined support for bipartitions in the reference topology as well as for their most  
356 prevalent conflicting bipartitions by calculating their gene support frequencies (GSF). GSF refers  
357 to the fraction of single gene trees that recover a particular bipartition. Currently, RAXML can

358 only calculate GSF for trees with full taxon representation. Since our dataset contained partial  
359 gene trees, we conducted custom tests for determining GSF. To calculate GSF for NT (GSF<sub>NT</sub>)  
360 and AA (GSF<sub>AA</sub>) single gene trees, we extracted subtrees for the taxa of interest in individual  
361 single gene trees and counted the occurrence of various topologies. For example, consider there  
362 are three taxa represented as A, B, and C, the reference rooted topology is “((A,B),C);” and the  
363 alternative rooted topology is “((A,C),B);”. We counted how many single gene trees supported  
364 “(A,B),” or “(A,C),”. For reference and alternative topologies involving more than three taxa or  
365 sections, we conducted similar tests. For example, if the reference rooted topology is  
366 “(((A,B),C),D);” and the alternative rooted topology is “((A,B),(C,D));”, we counted how many  
367 single gene phylogenies supported “((A,B),C),” as sister to D and how many single gene  
368 phylogenies supported “(A,B),” and “(C,D),” as pairs of sister clades. For conflicting bipartitions  
369 at shallow depths in the phylogeny (i.e., among closely related species), we required all taxa to  
370 be present in a single gene tree; for conflicting bipartitions near the base of the phylogeny (i.e.,  
371 typically involving multiple sections), we required at least one species to be present from each  
372 section of interest (with the exception of *Exilicaulis* because this section is not monophyletic).  
373 Scripts to determine GSF were written using functions provided in NEWICK UTILITIES, version  
374 1.6<sup>95</sup>.

375

### 376 **Estimating divergence times**

377 To estimate the divergence times for the phylogeny of the Aspergillaceae, we analyzed our NT  
378 data matrix using the Bayesian method implemented in MCMCTREE from the PAML package,  
379 version 4.9d<sup>96</sup>. To do so, we conducted four analyses: we (i) identified genes evolving in a  
380 “clock-like” manner from the full data matrix, (ii) estimated the substitution rate across these

381 genes, (iii) estimated the gradient and Hessian<sup>97</sup> at the maximum likelihood estimates of branch  
382 lengths, and (iv) estimated divergence times by Markov chain Monte Carlo (MCMC) analysis.

383

384 (i) Identifying “clock-like” genes

385 Currently, large phylogenomic data matrices that contain hundreds to thousands of genes and  
386 many dozens of taxa are intractable for Bayesian inference of divergence times; thus, we  
387 identified and used only those genes that appear to have evolved in a “clock-like” manner in the  
388 inference of divergence times. To identify genes evolving in a “clock-like” manner, we  
389 calculated the degree of violation of a molecular clock (DVMC)<sup>98</sup> for single gene trees. DVMC  
390 is the standard deviation of root to tip distances in a phylogeny and is calculated using the  
391 following formula:

392

$$\text{DVMC} = \sqrt{\frac{1}{n-1} \sum_{i=1}^n (t_i - \bar{t})^2}$$

393 where  $t_i$  represents the distance between the root and species  $i$  across  $n$  species. Using this  
394 method, genes with low DVMC values evolve in a “clock-like” manner compared to those with  
395 higher values. We took the top scoring 834 (50%) genes and bootstrap subsampled 250 genes  
396 without replacement. We decided to use 250 genes because a previous study with a similar  
397 number of taxa used a similar number of genes<sup>98</sup>.

398

399 (ii) Estimating substitution rate

400 To estimate the substitution rate across the 250 genes, we used BASEML from the PAML package,  
401 version 4.9d<sup>96</sup>. We estimated substitution rate using a “GTR+G” model of substitutions (model =  
402 7) and a strict clock model (clock = 1). Additionally, we point calibrated the root of the tree to 96

403 million years ago (mya) according to TIMETREE<sup>99</sup>, which is based on previous estimations<sup>100</sup>:  
404 50.0 mya;<sup>101</sup> 96.1 mya;<sup>102</sup> 146.1 mya. We found the estimated per site substitution rate per  
405 time unit was 0.04.

406

407 (iii) Estimation of the gradient and Hessian

408 To save computing time, the likelihood of the alignment was approximated using a gradient and  
409 Hessian matrix. The gradient and Hessian refer to the first and second derivatives of the log-  
410 likelihood function at the maximum likelihood estimates of branch lengths<sup>97</sup>, and collectively  
411 describe the curvature of the log-likelihood surface. Estimating gradient and Hessian requires an  
412 input tree with specified time constraints. For time constraints, we used the *Aspergillus flavus* –  
413 *Aspergillus oryzae* split (3.68-3.99 mya<sup>102,103</sup>), the *Aspergillus fumigatus* – *Aspergillus clavatus*  
414 split (35-59 mya<sup>102,103</sup>), the origin of the genus *Aspergillus* (43-85 mya<sup>102,104–107</sup>), and the origin  
415 of Aspergillaceae (50-146 mya<sup>100–102</sup>) as obtained from TIMETREE<sup>99</sup>.

416

417 (iv) Estimating divergence times using MCMC analysis

418 To estimate divergence times, we used the resulting gradient and Hessian results from the  
419 previous step for use in MCMC analysis using MCMCTREE<sup>96</sup>. To do so, a gamma distribution  
420 prior shape and scale must be specified. The gamma distribution shape and scale is determined  
421 from the substitution rate determined in step ii where shape is  $a=(s/s)^2$  and scale is  $b=s/s^2$  and  $s$   
422 is the substitution rate. Therefore,  $a=1$  and  $b=25$  and the “rgene\_gamma” parameter was set to  
423 “1 25.” We also set the “sigma2\_gamma” parameter to “1 4.5.” To minimize the effect of initial  
424 values on the posterior inference, we discarded the first 100,000 results. Thereafter, we sampled  
425 every 500 iterations until 10,000 samples were gathered. Altogether, we ran 5.1 million iterations

426 (100,000 + 500 x 10,000), which is 510 times greater than the recommended minimum for  
427 MCMC analysis<sup>108</sup>. Lastly, we set the “finetune” parameter to 1.

428

429 To determine the stability of inferred divergence time estimates, we constructed two additional  
430 matrices of 250 genes, repeated the analyses in steps ii-iv, and compared results. The two  
431 additional data matrices were constructed by independently bootstrap subsampling 250 genes  
432 without replacement from the 834 genes with the best DVMC values. We subsequently repeated  
433 steps ii-iv and conducted correlation analyses between the three sets of 250 genes to determine  
434 the stability of inferred divergence times.

435

### 436 **Statistical analysis and figure making**

437 All statistical analyses were conducted in R, version 3.3.2<sup>91</sup>. Spearman rank correlation  
438 analyses<sup>109</sup> were conducted using the “rcorr” function in the package HMISC, version 4.1-1<sup>110</sup>.  
439 Stacked barplots, barplots, histograms, scatterplots, and boxplots were made using GGLOT2,  
440 version 2.2.1<sup>111</sup>. Intersection plots (also known as UpSet plots), were made using UPSETR,  
441 version 1.3.3<sup>112</sup>. The topological similarity heatmap and hierarchical clustering was done using  
442 PHEATMAP, version 1.0.8<sup>113</sup>. Phylogenetic trees were visualized using FIGTREE, version 1.4.3<sup>114</sup>.  
443 The phylogenetic tree with the geological time scale was visualized using STRAP, version 1.4<sup>115</sup>.  
444 Artistic features of figures (e.g., font size, font style, etc.) were minimally edited using the  
445 graphic design software Affinity Designer (<https://affinity.serif.com/en-us/>).

## 446 **Results**

### 447 **The examined genomes have nearly complete gene sets**

448 Assessment of individual gene set completeness showed that most of the 93 genomes (81 in the  
449 ingroup and 12 in the outgroup) used in our study contain nearly complete gene sets and that all  
450 93 genomes are appropriate for phylogenomic analyses. Specifically, the average percentage of  
451 BUSCO single-copy genes from the Pezizomycotina database<sup>55</sup> present was  $96.2 \pm 2.6\%$   
452 (minimum: 81.1%; maximum: 98.9%; Figure S2). Across the 93 genomes, only 3 (3.2%)  
453 genomes had < 90% of the BUSCO genes present in single-copy (*Penicillium carneum*: 88.6%;  
454 *Penicillium verrucosum*: 86.1%; and *Histoplasma capsulatum*: 81.1%).

455

### 456 **The generated data matrices exhibit very high taxon occupancy**

457 The NT and AA alignments of the 1,668-gene data matrix were comprised of 3,163,258 and  
458 1,054,025 sites, respectively. The data matrix exhibited very high taxon occupancy (average  
459 gene taxon occupancy:  $97.2 \pm 0.1\%$ ; minimum: 52.7%; maximum: 100%; Figure S7a, b; File  
460 S2). 417 genes had 100% taxon-occupancy, 1,176 genes had taxon-occupancy in the 90% to  
461 99.9% range, and only 75 genes had taxon occupancy lower than 90%. Assessment of the 1,668  
462 genes for five criteria associated with strong phylogenetic signal (gene-wise alignment length,  
463 average bootstrap value, completeness, treeness / RCV, and the number of variable sites)  
464 facilitated the construction of five subsampled matrices derived from 50% of the top scoring  
465 genes (Figure S7; File S2).

466

467 Examination of the gene content differences between the 5 NT subsampled data matrices as well  
468 as between the 5 AA data matrices revealed that they are composed of variable sets of genes

469 (Figure S8). For example, the largest intersection among NT data matrices comprised of 207  
470 genes that were shared between all NT matrices except the completeness-based one; similarly,  
471 the largest intersection among AA data matrices was 228 genes and was shared between all AA  
472 matrices except the completeness-based one (Figure S8a, b). Examination of the number of gene  
473 overlap between the NT and AA data matrices for each criterion (Figure S8c) showed that three  
474 criteria yielded identical or nearly identical NT and AA gene sets. These were completeness (834  
475 / 834; 100% shared genes;  $r_s = 1.00$ ,  $p < 0.01$ ; Figure S7c), alignment length (829 / 834; 99.4%  
476 shared genes;  $r_s = 1.00$ ,  $p < 0.01$ ; Figure S7f), and the number of variable sites (798 / 834; 95.7%  
477 shared genes;  $r_s = 0.99$ ,  $p < 0.01$ ; Figure S7i). The other two criteria showed greater differences  
478 between NT and AA data matrices (average bootstrap value: 667 / 834; 80.0% shared genes;  $r_s =$   
479 0.78,  $p < 0.01$ ; Figure S7l; treeness / RCV: 644 / 834; 77.2% shared genes;  $r_s = 0.72$ ,  $p < 0.01$ ;  
480 Figure S7o).

481

## 482 **A genome-scale phylogeny for the family Aspergillaceae**

483 NT and AA phylogenomic analyses of the full data matrix and the five subsampled data matrices  
484 under three analytical schemes recovered a broadly consistent set of relationships (Figure 1, 2, 3,  
485 4). Across all 36 species-level phylogenies, we observed high levels of topological similarity  
486 (average topological similarity:  $97.2 \pm 2.5\%$ ; minimum: 92.2%; maximum: 100%) (Figure 2),  
487 with both major genera (*Aspergillus* and *Penicillium*) as well as all sections, with the exception  
488 of *Exilicaulis*, in *Aspergillus* and *Penicillium*<sup>50,116</sup> recovered as monophyletic (Figures 1, 3, and  
489 4). Additionally, all but one internodes exhibited absolute UFBoot scores<sup>84</sup>; the sole exception  
490 was internode 33 (I33), which received 95 UFBoot support (Figure 1 and S9).

491

492 Surprisingly, one taxon previously reported to be part of Aspergillaceae, *Basipetospora*  
493 *chlamydospora*, was consistently placed among outgroup species (Figure 1) and may represent a  
494 misidentified isolate. A similarly surprising placement was observed for *Aspergillus*  
495 *ochraceoroseus* IBT 24754<sup>33</sup>, which our phylogenies consistently placed in section *Nigri* (Figure  
496 1) rather than, as expected based on previous work, in section *Ochraceorosei*<sup>117</sup>. To explore this  
497 placement further, we reconstructed a phylogeny of closely related *Aspergillus* species from  
498 sections *Flavi*, *Ochraceorosei*, *Usti*, *Versicolores*, *Nidulantes*, and *Nigri* and included another *A.*  
499 *ochraceoroseus* isolate, strain SRRC1432<sup>118</sup> using the same set of 1,668 BUSCO genes as well  
500 as a larger set of 3,150 BUSCO genes. Phylogenomic analysis of these two data matrices  
501 recovered *A. ochraceoroseus* SRRC1432 as sister to *A. rambellii* in section *Ochraceorosei*,  
502 consistent with the original description of section *Ochraceorosei*<sup>119</sup>. In contrast, *A.*  
503 *ochraceoroseus* IBT 24754 remained placed within *Nigri* (Figure S10a and b). Hypothesizing  
504 that *A. ochraceoroseus* IBT 24754 may represent a misidentified isolate, we examined its  
505 genome size and number of genes in relation to those of *A. ochraceoroseus* SRRC1432 and *A.*  
506 *rambellii* and found them to be very different (Figure S10c). Specifically, *A. ochraceoroseus* IBT  
507 24754 has 11,939 genes and a genome size of 35.4 Mbp while *A. ochraceoroseus* SRRC1432  
508 and *A. rambellii* have gene counts of 7,829 and 7,761 and genome sizes of 24.3 and 26.4 Mbp.  
509 Together, these results suggest that *A. ochraceoroseus* IBT 24754 is a misidentified *Aspergillus*  
510 species belonging to section *Nigri*; to avoid further confusion, we henceforth refer to this strain  
511 as *A. spp.* IBT 24574 (Figure S10d).

512



513 **Examination of the Aspergillaceae phylogeny reveals 12 incongruent bipartitions**

514 Examination of all 36 species-level phylogenies revealed the existence of 8 (8 / 78; 10.3%)  
515 incongruent bipartitions. Complementary examination of IC, a bipartition-based measure of  
516 incongruence, revealed an additional 4 / 78 (5.1%) bipartitions that displayed very high levels of  
517 incongruence at the gene level, raising the total number of incongruent bipartitions to 12 (12 /  
518 78; 15.4%).

519  
520 Examination of the eight conflicting bipartitions stemming from the comparison of the 36  
521 phylogenies showed that they were very often associated with data type (NT or AA) and scheme  
522 employed (concatenation or coalescence). For example, the first instance of incongruence  
523 concerns the identity of the sister species to *Penicillium bifforme* (I60; Figure 1 and 3a); this  
524 species is *P. camemberti* in the reference phylogeny but analyses of the full and two subsampled  
525 AA data matrices with coalescence recover instead *Penicillium fuscoglaucum*. The data type and  
526 analytical scheme employed also appear to underlie the second and third instances of  
527 incongruence, which concern the polyphyly of section *Exilicaulis* (I74 and I78; Figures 1 and  
528 3b), the fourth and fifth instances, which concern relationships among *Aspergillus* sections (I24  
529 and I35; Figures 1 and 3c), as well as the sixth instance, which concerns relationships among the  
530 sections *Digitata*, *Chrysogena*, and *Roquefortorum* (I63; Figure 1 and 3d). The seventh instance  
531 is also associated with data type, but not with the scheme employed; while the reference as well  
532 as most subsampled NT matrices support the *Aspergillus persii* and *Aspergillus sclerotiorum*  
533 clade as sister to *Aspergillus westerdijkiae* (I33; Figure 1 and 3e), most AA data matrices recover  
534 a conflicting bipartition where *A. steynii* is the sister group of *A. westerdijkiae*. The final instance  
535 of incongruence was the least well supported, as 35 / 36 (97.2%) phylogenies supported

536 *Aspergillus kawachii* as the sister group to *Aspergillus awamori* (I15, Figure 1 and 3f), but  
537 analysis of one AA subsampled data matrix with coalescence instead recovered *Aspergillus*  
538 *luchuensis* as the sister group.

539

540 For each of these bipartitions (Figure 3), we examined clustering patterns using multiple  
541 correspondence analysis of matrix features (i.e., sequence type and subsampling method) and  
542 analysis scheme among trees that support the reference and alternative topologies (Figure S11).  
543 Distinct clustering patterns were observed for I74, I78, and I33 (Figure 3 and S11). For I74 and  
544 I78, there are three alternative, conflicting topologies, with the first two clustering separately  
545 from the third (Figure 3b and S11b). For I33, phylogenies that support the reference and  
546 alternative topologies formed distinct clusters (Figure 3e). Examination of the contribution of  
547 variables along the second dimension, which is the one that differentiated variables that  
548 supported each topology, revealed that the distinct clustering patterns were driven by sequence  
549 type (Figure S11g and h).

550

551 Examination of IC values revealed four additional bipartitions with strong signatures for  
552 incongruence at the gene level, defined as IC score lower than 0.10. The first instance concerns  
553 the sister taxon to the *Aspergillus* and *Penicillium* clade. Although all 36 phylogenies recover a  
554 clade comprised of *Xeromyces bisporus* and *Monascus ruber* as the sister group, the IC score for  
555 this bipartition is 0.00 (I3; Figure 4a); the most prevalent, conflicting bipartition supports  
556 *Penicillium zonata* as sister to *Aspergillus* and *Penicillium* (Figure 4a). Similarly, although all  
557 36 phylogenies recover *Penicillium* as sister to *Aspergillus*, the IC score for this bipartition is  
558 also 0.00 (I4; Figure 4b); the most prevalent, conflicting bipartition supports *X. bisporus* and *M.*

559 *ruber* as the sister clade to *Aspergillus* (Figure 4b). In the third instance, all 36 phylogenies  
560 support *Aspergillus novofumigatus* and *Aspergillus lentulus* as sister species, but the IC score of  
561 this bipartition is 0.01 (I43; Figure 4c); the most prevalent, conflicting bipartition recovers *A.*  
562 *lentulus* as the sister species to a clade comprised of *Aspergillus fumigatus* and *Aspergillus*  
563 *fischeri* (Figure 4c). Finally, all 36 phylogenies supported a clade of *Penicillium solitum*,  
564 *Penicillium polonicum*, and *Penicillium frei* as sister to a clade of *Penicillium nordicum* and  
565 *Penicillium verrucosum*, but the IC score for this bipartition is 0.01 (I55; Figure 4d); the most  
566 prevalent, conflicting bipartition supports the clade of *P. solitum*, *P. polonicum*, and *P. frei* as  
567 sister to a clade of *P. camemberti*, *P. biforme* and *P. fuscoglaucum* (Figure 4d).

568

569 To examine the underlying individual gene support to the resolution of these 12 bipartitions, we  
570 examined the phylogenetic signal contributed by each individual gene in the full NT data matrix.  
571 In all 12 bipartitions, we found that inferences were robust to single gene outliers with strong  
572 phylogenetic signal (Figure S12; File S4).

573

#### 574 **Incongruence in the Aspergillaceae phylogeny**

575 Examination of the 12 incongruent bipartitions with respect to their placement on the phylogeny  
576 (shallow, i.e., near the tips of the phylogeny or deeper, i.e., away from the tips and toward the  
577 base of the phylogeny) and the amount of conflict (quantified using IC and GSF) allowed us to  
578 group them into three categories: (i) shallow bipartitions (I15 and I60) with low levels of  
579 incongruence, (ii) shallow bipartitions (I33, I43, and I55) with high levels of incongruence, and  
580 (iii) deeper bipartitions (I3, I4, I24, I35, I63, I74, and I78) with varying levels of incongruence  
581 and typically associated with single taxon long branches.

582

583 (i) Shallow bipartitions with low levels of incongruence

584 The two bipartitions that fell into this category, I60 (Figure 3a) and I15 (Figure 3f), exhibited

585 low levels of incongruence among closely related taxa. For I60, the reference bipartition was

586 observed in 33 / 36 phylogenies, had an IC score of 0.22, and  $GSF_{NT}$  and  $GSF_{AA}$  scores of 0.70

587 and 0.21, respectively. Similarly, the reference bipartition for I15 was observed in 35 / 36

588 phylogenies, had an IC score of 0.39, and  $GSF_{NT}$  and  $GSF_{AA}$  scores of 0.84 and 0.47,

589 respectively. Notably, the  $GSF_{NT}$  scores were substantially higher for the reference bipartitions in

590 both of these cases.

591

592 (ii) Shallow bipartitions with high levels of incongruence

593 The three shallow bipartitions, I33 (Figure 3e), I43 (Figure 4c), and I55 (Figure 4d), in this

594 category exhibited high levels of incongruence among closely related taxa. For I33, the reference

595 bipartition was observed in 16 / 36 (44.4%), had an IC score of 0.00, and  $GSF_{NT}$  and  $GSF_{AA}$

596 scores of 0.38 and 0.27, respectively. The reference bipartition for I43 was observed in all 36

597 phylogenies, had an IC score of 0.01 and  $GSF_{NT}$  and  $GSF_{AA}$  scores of 0.39 and 0.22,

598 respectively. Similarly, the reference bipartition I55 was observed in all 36 phylogenies, had an

599 IC score of 0.01, and  $GSF_{NT}$  and  $GSF_{AA}$  scores of 0.51 and 0.31, respectively. Notably, in all

600 three cases, substantial fractions of genes supported both the reference and the conflicting

601 bipartitions, with both the  $GSF_{NT}$  and  $GSF_{AA}$  scores of each pair of bipartitions being almost

602 always higher than 0.2.

603

604 (iii) Deeper bipartitions often associated with single taxon long branches

605 The seven bipartitions in this category were I74 and I78 (Figure 3b), I24 and I35 (Figure 3c), I63  
606 (Figure 3d), I3 (Figure 4a), and I4 (Figure 4b). All of them are located deeper in the tree and  
607 most involve single taxa with long terminal branches (Figure 1). The reference bipartitions for  
608 internodes I74 and I78, which concern relationships among the sections *Lanata-divaricata*,  
609 *Exilicaulis* and *Citrina*, were observed in 26 / 36 (72.2%) phylogenies; the remaining 10 / 36  
610 (27.8%) phylogenies recovered three alternative, conflicting bipartitions. Both reference  
611 bipartitions had IC scores of 0.01, and GSF<sub>NT</sub> and GSF<sub>AA</sub> scores of 0.11 and 0.07, respectively.  
612 The reference bipartitions for internodes I24 and I35, which concern the placement of  
613 *Aspergillus terreus*, the single taxon representative of section *Terrei*, were observed in 27 / 36  
614 (75.0%) phylogenies, had IC scores of 0.01 and 0.02, and GSF<sub>NT</sub> and GSF<sub>AA</sub> scores of 0.17 and  
615 0.09, respectively. The reference bipartition I63, which involved the placement of the  
616 *Penicillium digitatum*, the sole representative of section *Digitata*, was observed in 28 / 36  
617 (77.8%), had an IC score of 0.07, and GSF<sub>NT</sub> and GSF<sub>AA</sub> scores of 0.41 and 0.28, respectively.  
618 Finally, the reference bipartitions I3 and I4 (Figure 4), which concern the identity of the sister  
619 taxon of *Aspergillus* and *Penicillium* (I3) and the identity of the sister taxon of *Aspergillus* (I4),  
620 were not observed among the 36 phylogenies but both had IC values of 0.00. For I3, GSF<sub>NT</sub> and  
621 GSF<sub>AA</sub> scores were 0.12 and 0.15, respectively. For I4, GSF<sub>NT</sub> and GSF<sub>AA</sub> scores were 0.24 and  
622 0.28, respectively.

623

## 624 **A geological timeline for the evolutionary diversification of the Aspergillaceae** 625 **family**

626 To estimate the evolutionary diversification among *Aspergillaceae*, we subsampled the 1,668-  
627 gene matrix for high-quality genes with “clock-like” rates of evolution by examining DVMC<sup>98</sup>

628 values among single gene trees. Examination of the DVMC values facilitated the identification  
629 of a tractable set of high-quality genes for relaxed molecular clock analyses (Figure S13). We  
630 found that *Aspergillaceae* originated 125.1 (95% CI: 146.7 - 102.1) mya during the Cretaceous  
631 period (Figure 5). We found that the common ancestor of *Aspergillus* and *Penicillium* split from  
632 the *X. bisporus* and *M. ruber* clade shortly thereafter, approximately 114.3 (95% CI: 135.5 -  
633 96.5) mya. We also found that the genera *Aspergillus* and *Penicillium* split 102.4 (95% CI: 122.3  
634 - 88.2) mya, with the last common ancestor of *Aspergillus* originating approximately 84.3 mya  
635 (95% CI: 90.9 - 77.6) and the last common ancestor of *Penicillium* originating approximately  
636 77.4 mya (95% CI: 94.0 - 61.0).

637  
638 Our analysis also provides estimates of the origin of various iconic sections within *Aspergillus*  
639 and *Penicillium*. Among *Aspergillus* sections, section *Nigri*, which includes the industrial  
640 workhorse *A. niger*, originated 51.6 (95% CI: 63.4 - 38.1) mya. Section *Flavi*, which includes the  
641 food fermenters *A. oryzae* and *A. sojae* and the plant pathogen *A. flavus*, originated 32.6 (95%  
642 CI: 45.5 - 22.4) mya. Additionally, section *Fumigati*, which includes the opportunistic human  
643 pathogen *A. fumigatus*, originated 17.4 (95% CI: 24.7 - 11.9) mya. Among *Penicillium* sections,  
644 section *Fasiculata*, which contains Camembert and Brie cheese producer *P. camemberti* and the  
645 ochratoxin A producer, *P. verrucosum*, originated 7.1 (95% CI: 10.9 - 4.1) mya. Section  
646 *Chrysogena*, which includes the antibiotic penicillin producing species *P. chrysogenum*,  
647 originated 6.4 (95% CI: 11.5 - 3.2) mya. Additionally, section *Citrina*, which contains *P.*  
648 *citrinum*, which the first statin was isolated from and is commonly associated with moldy citrus  
649 fruits (Endo et al. 1976), originated 32.4 (95% CI: 46.1 - 20.8) mya.

650

## 651 **Discussion**

652 Our analyses provide a robust evaluation of the evolutionary relationships and diversification  
653 among Aspergillaceae, a family of biotechnologically and medically significant fungi. We  
654 scrutinized our proposed reference phylogeny (Figure 1) against 35 other phylogenies recovered  
655 using all possible combinations of six multi-gene data matrices (full or subsamples thereof),  
656 three maximum likelihood schemes, and two sequence types and complemented this analysis  
657 with bi-partitioned based measures of support (Figures 1 and 2). Through these analyses, we  
658 found that 12 / 78 (15.4%) bipartitions were incongruent (Figure 3 and 4) and explored the  
659 characteristics as well as sources of these instances of incongruence. Finally, we placed the  
660 evolution and diversification of Aspergillaceae in the context of geological time.

661  
662 Comparison of our 81-taxon, 1,668-gene phylogeny to a previous one based on a maximum  
663 likelihood analysis of 9 loci for 204 Aspergillaceae species<sup>116</sup>, suggests that our analyses  
664 identified and strongly supported several new relationships and resolved previously low  
665 supported bipartitions (Figure 1, Figure S14). The robust resolution of our phylogeny is likely  
666 due to the very large size of our data matrix, both in terms of genes as well as in terms of  
667 sequence. For example, the placement of *Aspergillus* section *Nigri* has been unstable in previous  
668 phylogenomic analyses (Figure S1)<sup>31,33,34</sup>, but our denser sampling of taxa in this section as well  
669 as inclusion of representative taxa from sections *Nidulantes*, *Versicolores*, *Usti*, and  
670 *Ochraceorosei* now provides strong support for the sister relationship of the *Aspergillus* section  
671 *Nigri* to sections *Nidulantes*, *Versicolores*, *Usti*, and *Ochraceorosei* (Figure 1).

672

673 However, our analysis also identified several relationships that exhibit high levels of  
674 incongruence (Figures 3 and 4). In general, gene tree incongruence can stem from biological or  
675 analytical factors<sup>30,42</sup>. Biological processes such as incomplete lineage-sorting (ILS)<sup>121</sup>,  
676 hybridization<sup>122</sup>, gene duplication and subsequent loss<sup>123</sup>, horizontal gene transfer<sup>124</sup>, and natural  
677 selection<sup>125,126</sup>, can cause the histories of genes to differ from one another and from the species  
678 phylogeny. Importantly, although the expected patterns of incongruence will be different for  
679 each factor and depend on a number of parameters, the observed patterns of conflict in each of  
680 the 12 cases of incongruence in the Aspergillaceae phylogeny can yield insights and allow the  
681 formation of hypotheses about the potential drivers in each case. For example, ILS often results  
682 in relatively low levels of incongruence; for instance, examination of the human, chimp, and  
683 gorilla genomes has showed that 20-25% of the gene histories differ from the species  
684 phylogeny<sup>127,128</sup>. In contrast, recent hybridization is expected to typically produce much higher  
685 levels of incongruence due to rampant sequence similarity among large amounts of genomic  
686 content; for instance, examination of *Heliconius* butterfly genomes revealed incongruence levels  
687 higher than 40%<sup>129</sup>.

688  
689 Additionally, analytical factors such as model choice<sup>130</sup> and taxon sampling<sup>131,132</sup> can lead to  
690 erroneous inference of gene histories. Perhaps the most well-known instance of incongruence  
691 stemming from analytical factors is what is known as “long branch attraction”, namely the  
692 situation where highly divergent taxa, i.e., the ones with the longest branches in the phylogeny,  
693 will often artifactually group with other long branches<sup>133</sup>.

694



695 Examination of the patterns of incongruence in the Aspergillaceae phylogeny allows us to not  
696 only group the 12 incongruent internodes with respect to their patterns of conflict but also to  
697 postulate putative drivers of the observed incongruence. For example, both I15 and I60 are  
698 shallow internodes exhibiting low levels of incongruence, suggesting that one likely driver of the  
699 observed incongruence is ILS. In contrast, the shallow internodes I33, I43, and I55 exhibit much  
700 higher levels of incongruence that are most likely to be the end result of processes, such as  
701 hybridization or repeated introgression. Finally, the remaining seven incongruent internodes (I3,  
702 I4, I24, I35, I63, I74, and I78) exhibit varying levels of incongruence and are typically associated  
703 with single taxon long branches (Figures 1, 3, and 4), implicating taxon sampling as a likely  
704 driver of the observed incongruence. Given that inclusion of additional taxa robustly resolved the  
705 previously ambiguous placement of the long-branched *Aspergillus* section *Nigri* (see discussion  
706 above), we predict that additional sampling of taxa that break up the long branches associated  
707 with these seven internodes will lead to their robust resolution.

708  
709 Finally, our relaxed molecular clock analysis of the Aspergillaceae phylogeny provides a robust  
710 but also comprehensive time-scale for the evolution of Aspergillaceae and its two large genera,  
711 *Aspergillus* and *Penicillium* (Figure 5), filling a gap in the literature. Previous molecular clock  
712 studies provided estimates for only four internodes, mostly within the genus *Aspergillus*<sup>99-107</sup> and  
713 yielded much greater time intervals. For example, the previous estimate for the origin of  
714 Aspergillaceae spanned nearly 100 mya (50-146 mya<sup>100-102</sup>) while our dataset and analysis  
715 provided a much narrower range of 44.5 mya (mean: 125.1; 95% CI: 146.7 - 102.1).

716

## 717 **Conclusion**

718 Fungi from Aspergillaceae have diverse ecologies and play significant roles in biotechnology  
719 and medicine. Although most of the 81 genomes from Aspergillaceae are skewed towards two  
720 iconic genera, *Aspergillus* and *Penicillium*, and do not fully reflect the diversity of the family,  
721 they do provide a unique opportunity to examine the evolutionary history of these important  
722 fungi using a phylogenomic approach. Our scrutiny of the Aspergillaceae phylogeny, from the  
723 Cretaceous to the present, provides strong support for most relationships within the family as  
724 well as identifies a few that deserve further examination. Our results suggest that the observed  
725 incongruence is likely associated with diverse processes such as incomplete lineage sorting,  
726 hybridization and introgression, as well as with analytical issues associated with poor taxon  
727 sampling. Our elucidation of the tempo and pattern of the evolutionary history of Aspergillaceae  
728 provides a robust phylogenetic and temporal framework for investigation the evolution of  
729 pathogenesis, secondary metabolism, and ecology of this diverse and important fungal family.

730 **Data availability**

731 All data matrices, species-level and single-gene phylogenies will be available through the  
732 figshare repository upon acceptance for publication. The genome sequence and raw reads of  
733 *Aspergillus delacroixii* have been uploaded to GenBank as BioProject PRJNA481010.

## 734 **Acknowledgements**

735 We thank members of the Rokas laboratory for helpful suggestions and discussion. We thank  
736 Nathan McDonald for technical help with DNA extraction. This work was conducted, in part,  
737 using the Advanced Computing Center for Research and Education at Vanderbilt University. JLS  
738 was supported by the Graduate Program in Biological Sciences at Vanderbilt University. This  
739 work was supported, in part, by the National Science Foundation (DEB-1442113 to A.R.), the  
740 Burroughs Wellcome Fund, and a Guggenheim fellowship (to A.R.).

741

## 742 **Main Figure Legends**

### 743 **Figure 1. A robust genome-scale phylogeny for the fungal family Aspergillaceae.**

744 Different genera are depicted using different colored boxes; *Aspergillus* is shown in red,  
745 *Penicillium* in blue, *Xeromyces* in green, *Monascus* in purple, and *Penicilliopsis* in orange.  
746 Different sections within *Aspergillus* and *Penicillium* are depicted with alternating dark grey and  
747 grey bars. Internode certainty values are shown below each internode and bootstrap values are  
748 shown above each internode (only bootstrap values lower than 100 percent supported are  
749 shown). Internode certainty values were calculated using the 1,668 maximum likelihood single  
750 gene trees. 5,000 ultrafast bootstrap replicates were used to determine internode support.  
751 Internodes were considered unresolved if they were not present in one or more of the other 35  
752 phylogenies represented in Figure 2 – the branches of these unresolved internodes are drawn in  
753 red. The inset depicts the phylogeny with branch lengths corresponding to estimated nucleotide  
754 substitutions per site. Colored circles next to species names indicate the lifestyle or utility of the  
755 species (i.e., animal pathogen, dark orange; plant pathogen, purple; food fermenter, green; post-  
756 harvest food contaminant, pink; industrial workhorse, grey; genetic model, black; other, white).  
757 Exemplary secondary metabolites produced by different Aspergillaceae species are depicted to  
758 the right of the colored circles.

759

### 760 **Figure 2. Topological similarity between the 36 phylogenies constructed using 6 different** 761 **data matrices, 2 different sequence types, and 3 analytical schemes.**

762 (a) A heatmap depiction of topological similarity between the 36 phylogenies constructed in this  
763 study. The 36 phylogenies were inferred from analyses of 2 different sequence types (i.e.,  
764 protein: depicted in black; nucleotide: depicted in white), 3 different analytical schemes (i.e.,

765 partitioned: depicted in black; non-partitioned: depicted in grey; coalescence: depicted in white),  
766 and 6 different matrices (full data matrix: “BUSCO1668”, and 5 subsampled ones, all starting  
767 with “T834”; depending on the subsampling strategy, they are identified as “T834 Alignment  
768 lengths”, “T834 Average bootstrap value”, “T834 Completeness”, “T834 Treeness / RCV”, and  
769 T834 Variable sites”). (b) Hierarchical clustering based off of topological similarity values  
770 among the 36 phylogenies.

771

772 **Figure 3. The eight internodes not recovered in all 36 phylogenies.**

773 Internode numbers refer to internodes that have at least one conflicting topology among the 36  
774 phylogenetic trees inferred from the full and five subsampled data matrices across three different  
775 schemes and two data types. The internode recovered from the analysis of the 1,668-gene  
776 nucleotide matrix (Figure 1) is shown on the left and the conflicting internode(s) on the right.  
777 Next to each of the internodes, the nucleotide (nt) and amino acid (aa) gene support frequency  
778 (GSF) values are shown. On the far right, the sequence type, scheme, and data matrix  
779 characteristics of the phylogenies that supports the conflicting internodes are shown. Nt and aa  
780 sequence types are represented using black and white squares, respectively; partitioned  
781 concatenation, non-partitioned concatenation, and coalescence analytical schemes are depicted as  
782 black, grey, or white circles, respectively; and the matrix subset is written next to the symbols.

783

784 **Figure 4. The four internodes recovered in all 36 phylogenies but that exhibit very low**  
785 **internode certainty values.**

786 Four bipartitions were recovered by all 36 phylogenies but had internode certainty values below  
787 0.10. The internode recovered from the analysis of all 36 phylogenies, including of the 1,668-

788 gene nucleotide matrix (Figure 1), is shown on the left and the most prevalent, conflicting  
789 internode on the right. Next to each of the internodes, the nucleotide (nt) and amino acid (aa)  
790 gene support frequency (GSF) values are shown.

791

792 **Figure 5. A molecular timetree for the family Aspergillaceae.**

793 Blue boxes around each internode correspond to 95% divergence time confidence intervals for  
794 each branch of the Aspergillaceae phylogeny. For reference, the geologic time scale is shown  
795 right below the phylogeny. Different genera are depicted using different colored boxes;  
796 *Aspergillus* is shown in red, *Penicillium* in blue, *Xeromyces* in green, *Monascus* in purple, and  
797 *Penicilliopsis* in orange. Different sections within *Aspergillus* and *Penicillium* are depicted with  
798 alternating dark grey and grey bars. Dating estimates were calibrated using the following  
799 constraints: origin of Aspergillaceae (I2; 50-146 million years ago [mya]), origin of *Aspergillus*  
800 (I5; 43-85 mya) the *A. flavus* and *A. oryzae* split (I30; 3.68-3.99 mya), and the *A. fumigatus* and  
801 *A. clavatus* split (I38; 35-39 mya); all constraints were obtained from TIMETREE<sup>99</sup>.

802

## 803 **References**

- 804 1. Houbraken, J., de Vries, R. P. & Samson, R. A. in *Advances in Applied Microbiology* **86**,  
805 199–249 (2014).
- 806 2. Benson, D. A., Karsch-Mizrachi, I., Lipman, D. J., Ostell, J. & Wheeler, D. L. GenBank.  
807 *Nucleic Acids Res.* **36**, D25–D30 (2007).
- 808 3. Sayers, E. W. *et al.* Database resources of the National Center for Biotechnology  
809 Information. *Nucleic Acids Res.* **37**, D5–D15 (2009).
- 810 4. Pitt, J. I. in *Advances in experimental medicine and biology* **504**, 29–41 (2002).
- 811 5. Ogundero, V. W. Factors affecting growth and cellulose hydrolysis by the thermotolerant  
812 *Aspergillus nidulans* from composts. *Acta Biotechnol.* **3**, 65–72 (1983).
- 813 6. Gibbons, J. G. & Rokas, A. The function and evolution of the *Aspergillus* genome. *Trends*  
814 *Microbiol.* **21**, 14–22 (2013).
- 815 7. Machida, M., Yamada, O. & Gomi, K. Genomics of *Aspergillus oryzae*: Learning from  
816 the History of Koji Mold and Exploration of Its Future. *DNA Res.* **15**, 173–183 (2008).
- 817 8. Gibbons, J. G. *et al.* The Evolutionary Imprint of Domestication on Genome Variation and  
818 Function of the Filamentous Fungus *Aspergillus oryzae*. *Curr. Biol.* **22**, 1403–1409  
819 (2012).
- 820 9. Lessard, M.-H., Bélanger, G., St-Gelais, D. & Labrie, S. The Composition of Camembert  
821 Cheese-Ripening Cultures Modulates both Mycelial Growth and Appearance. *Appl.*  
822 *Environ. Microbiol.* **78**, 1813–1819 (2012).
- 823 10. Nelson, J. H. Production of Blue cheese flavor via submerged fermentation by *Penicillium*  
824 *roqueforti*. *J. Agric. Food Chem.* **18**, 567–569 (1970).
- 825 11. Pel, H. J. *et al.* Genome sequencing and analysis of the versatile cell factory *Aspergillus*



- 826 niger CBS 513.88. *Nat. Biotechnol.* **25**, 221–231 (2007).
- 827 12. Endo, A. A historical perspective on the discovery of statins. *Proc. Japan Acad. Ser. B* **86**,  
828 484–493 (2010).
- 829 13. Hedayati, M. T., Pasqualotto, A. C., Warn, P. A., Bowyer, P. & Denning, D. W.  
830 *Aspergillus flavus*: human pathogen, allergen and mycotoxin producer. *Microbiology* **153**,  
831 1677–1692 (2007).
- 832 14. Nierman, W. C. *et al.* Genomic sequence of the pathogenic and allergenic filamentous  
833 fungus *Aspergillus fumigatus*. *Nature* **438**, 1151–1156 (2005).
- 834 15. Ballester, A.-R. *et al.* Genome, Transcriptome, and Functional Analyses of *Penicillium*  
835 *expansum* Provide New Insights Into Secondary Metabolism and Pathogenicity. *Mol.*  
836 *Plant-Microbe Interact.* **28**, 232–248 (2015).
- 837 16. Marcet-Houben, M. *et al.* Genome sequence of the necrotrophic fungus *Penicillium*  
838 *digitatum*, the main postharvest pathogen of citrus. *BMC Genomics* **13**, 646 (2012).
- 839 17. Li, B. *et al.* Genomic Characterization Reveals Insights Into Patulin Biosynthesis and  
840 Pathogenicity in *Penicillium* Species. *Mol. Plant-Microbe Interact.* **28**, 635–647 (2015).
- 841 18. Vining, L. C. Functions of Secondary Metabolites. *Annu. Rev. Microbiol.* **44**, 395–427  
842 (1990).
- 843 19. Keller, N. P., Turner, G. & Bennett, J. W. Fungal secondary metabolism — from  
844 biochemistry to genomics. *Nat. Rev. Microbiol.* **3**, 937–947 (2005).
- 845 20. Macheleidt, J. *et al.* Regulation and Role of Fungal Secondary Metabolites. *Annu. Rev.*  
846 *Genet.* **50**, 371–392 (2016).
- 847 21. Rohlf, M., Albert, M., Keller, N. P. & Kempken, F. Secondary chemicals protect mould  
848 from fungivory. *Biol. Lett.* **3**, 523–525 (2007).

- 849 22. Rohlfs, M. & Churchill, A. C. L. Fungal secondary metabolites as modulators of  
850 interactions with insects and other arthropods. *Fungal Genet. Biol.* **48**, 23–34 (2011).
- 851 23. Squire, R. Ranking animal carcinogens: a proposed regulatory approach. *Science (80-. )*.  
852 **214**, 877–880 (1981).
- 853 24. Fleming, A. On the Antibacterial Action of Cultures of a *Penicillium*, with Special  
854 Reference to Their Use in the Isolation of *B. influenzae*. *Clin. Infect. Dis.* **2**, 129–139  
855 (1980).
- 856 25. Chain, E. *et al.* Penicillin as a chemotherapeutic agent. *Lancet* **236**, 226–228 (1940).
- 857 26. Aminov, R. I. A Brief History of the Antibiotic Era: Lessons Learned and Challenges for  
858 the Future. *Front. Microbiol.* **1**, (2010).
- 859 27. Pitt, J. I. & Taylor, J. W. *Aspergillus*, its sexual states and the new International Code of  
860 Nomenclature. *Mycologia* **106**, 1051–1062 (2014).
- 861 28. Samson, R. A. *et al.* Phylogeny, identification and nomenclature of the genus *Aspergillus*.  
862 *Stud. Mycol.* **78**, 141–173 (2014).
- 863 29. Salichos, L. & Rokas, A. Inferring ancient divergences requires genes with strong  
864 phylogenetic signals. *Nature* **497**, 327–331 (2013).
- 865 30. Rokas, A., Williams, B. L., King, N. & Carroll, S. B. Genome-scale approaches to  
866 resolving incongruence in molecular phylogenies. *Nature* **425**, 798–804 (2003).
- 867 31. de Vries, R. P. *et al.* Comparative genomics reveals high biological diversity and specific  
868 adaptations in the industrially and medically important fungal genus *Aspergillus*. *Genome*  
869 *Biol.* **18**, 28 (2017).
- 870 32. Nielsen, J. C. *et al.* Global analysis of biosynthetic gene clusters reveals vast potential of  
871 secondary metabolite production in *Penicillium* species. *Nat. Microbiol.* **2**, 17044 (2017).

- 872 33. Kjærboelling, I. *et al.* Linking secondary metabolites to gene clusters through genome  
873 sequencing of six diverse *Aspergillus* species. *Proc. Natl. Acad. Sci.* **115**, E753–E761  
874 (2018).
- 875 34. Yang, Y. *et al.* Genome Sequencing and Comparative Genomics Analysis Revealed  
876 Pathogenic Potential in *Penicillium capsulatum* as a Novel Fungal Pathogen Belonging to  
877 Eurotiales. *Front. Microbiol.* **7**, (2016).
- 878 35. Hess, J. & Goldman, N. Addressing Inter-Gene Heterogeneity in Maximum Likelihood  
879 Phylogenomic Analysis: Yeasts Revisited. *PLoS One* **6**, e22783 (2011).
- 880 36. Zhong, B., Liu, L., Yan, Z. & Penny, D. Origin of land plants using the multispecies  
881 coalescent model. *Trends Plant Sci.* **18**, 492–495 (2013).
- 882 37. Song, S., Liu, L., Edwards, S. V. & Wu, S. Resolving conflict in eutherian mammal  
883 phylogeny using phylogenomics and the multispecies coalescent model. *Proc. Natl. Acad.*  
884 *Sci.* **109**, 14942–14947 (2012).
- 885 38. Shen, X.-X. *et al.* Reconstructing the Backbone of the Saccharomycotina Yeast Phylogeny  
886 Using Genome-Scale Data. *G3 Genes/Genomes/Genetics* **6**, 3927–3939 (2016).
- 887 39. Suh, A. The phylogenomic forest of bird trees contains a hard polytomy at the root of  
888 Neoaves. *Zoologica Scripta* **45**, 50–62 (2016).
- 889 40. Arcila, D. *et al.* Genome-wide interrogation advances resolution of recalcitrant groups in  
890 the tree of life. *Nat. Ecol. Evol.* **1**, (2017).
- 891 41. King, N. & Rokas, A. Embracing Uncertainty in Reconstructing Early Animal Evolution.  
892 *Curr. Biol.* **27**, R1081–R1088 (2017).
- 893 42. Shen, X.-X., Hittinger, C. T. & Rokas, A. Contentious relationships in phylogenomic  
894 studies can be driven by a handful of genes. *Nat. Ecol. Evol.* **1**, 0126 (2017).

- 895 43. Riley, R. *et al.* Comparative genomics of biotechnologically important yeasts. *Proc. Natl.*  
896 *Acad. Sci.* **113**, 9882–9887 (2016).
- 897 44. Kobert, K., Salichos, L., Rokas, A. & Stamatakis, A. Computing the Internode Certainty  
898 and Related Measures from Partial Gene Trees. *Mol. Biol. Evol.* **33**, 1606–1617 (2016).
- 899 45. Salichos, L., Stamatakis, A. & Rokas, A. Novel Information Theory-Based Measures for  
900 Quantifying Incongruence among Phylogenetic Trees. *Mol. Biol. Evol.* **31**, 1261–1271  
901 (2014).
- 902 46. Zhou, X. *et al.* in silico Whole Genome Sequencer & Analyzer (iWGS): A  
903 Computational Pipeline to Guide the Design and Analysis of de novo Genome Sequencing  
904 Studies. *G3 Genes/Genomes/Genetics* (2016). doi:10.1534/g3.116.034249
- 905 47. Bankevich, A. *et al.* SPAdes: A New Genome Assembly Algorithm and Its Applications  
906 to Single-Cell Sequencing. *J. Comput. Biol.* **19**, 455–477 (2012).
- 907 48. Chikhi, R. & Medvedev, P. Informed and automated k-mer size selection for genome  
908 assembly. *Bioinformatics* **30**, 31–37 (2014).
- 909 49. Gurevich, A., Saveliev, V., Vyahhi, N. & Tesler, G. QUAST: quality assessment tool for  
910 genome assemblies. *Bioinformatics* **29**, 1072–1075 (2013).
- 911 50. Houbraken, J. & Samson, R. A. Phylogeny of *Penicillium* and the segregation of  
912 *Trichocomaceae* into three families. *Stud. Mycol.* **70**, 1–51 (2011).
- 913 51. Simão, F. A., Waterhouse, R. M., Ioannidis, P., Kriventseva, E. V. & Zdobnov, E. M.  
914 BUSCO: assessing genome assembly and annotation completeness with single-copy  
915 orthologs. *Bioinformatics* **31**, 3210–3212 (2015).
- 916 52. Eddy, S. R. Accelerated Profile HMM Searches. *PLoS Comput. Biol.* **7**, e1002195 (2011).
- 917 53. Madden, T. The BLAST sequence analysis tool. *BLAST Seq. Anal. Tool* 1–17 (2013).

- 918 54. Camacho, C. *et al.* BLAST+: architecture and applications. *BMC Bioinformatics* **10**, 421  
919 (2009).
- 920 55. Waterhouse, R. M., Tegenfeldt, F., Li, J., Zdobnov, E. M. & Kriventseva, E. V. OrthoDB:  
921 a hierarchical catalog of animal, fungal and bacterial orthologs. *Nucleic Acids Res.* **41**,  
922 D358–D365 (2013).
- 923 56. Stanke, M. & Waack, S. Gene prediction with a hidden Markov model and a new intron  
924 submodel. *Bioinformatics* **19**, ii215–ii225 (2003).
- 925 57. Waterhouse, R. M. *et al.* BUSCO Applications from Quality Assessments to Gene  
926 Prediction and Phylogenomics. *Mol. Biol. Evol.* **35**, 543–548 (2018).
- 927 58. Jarvis, E. D. *et al.* Whole-genome analyses resolve early branches in the tree of life of  
928 modern birds. *Science (80-. )*. **346**, 1320–1331 (2014).
- 929 59. Misof, B. *et al.* Phylogenomics resolves the timing and pattern of insect evolution. *Science*  
930 *(80-. )*. **346**, 763–767 (2014).
- 931 60. Katoh, K. & Standley, D. M. MAFFT Multiple Sequence Alignment Software Version 7:  
932 Improvements in Performance and Usability. *Mol. Biol. Evol.* **30**, 772–780 (2013).
- 933 61. Mount, D. W. Using BLOSUM in Sequence Alignments. *Cold Spring Harb. Protoc.*  
934 **2008**, pdb.top39–pdb.top39 (2008).
- 935 62. Cock, P. J. A. *et al.* Biopython: freely available Python tools for computational molecular  
936 biology and bioinformatics. *Bioinformatics* **25**, 1422–1423 (2009).
- 937 63. Capella-Gutierrez, S., Silla-Martinez, J. M. & Gabaldon, T. trimAl: a tool for automated  
938 alignment trimming in large-scale phylogenetic analyses. *Bioinformatics* **25**, 1972–1973  
939 (2009).
- 940 64. Shen, X.-X., Salichos, L. & Rokas, A. A Genome-Scale Investigation of How Sequence,

- 941 Function, and Tree-Based Gene Properties Influence Phylogenetic Inference. *Genome*  
942 *Biol. Evol.* **8**, 2565–2580 (2016).
- 943 65. Phillips, M. J. & Penny, D. The root of the mammalian tree inferred from whole  
944 mitochondrial genomes. *Mol. Phylogenet. Evol.* **28**, 171–185 (2003).
- 945 66. Felsenstein, J. Evolutionary trees from DNA sequences: A maximum likelihood approach.  
946 *J. Mol. Evol.* **17**, 368–376 (1981).
- 947 67. Edwards, S. V. Is a new and general theory of molecular systematics emerging? *Evolution*  
948 (*N. Y.*) **63**, 1–19 (2009).
- 949 68. Mirarab, S. & Warnow, T. ASTRAL-II: coalescent-based species tree estimation with  
950 many hundreds of taxa and thousands of genes. *Bioinformatics* **31**, i44–i52 (2015).
- 951 69. Nguyen, L.-T., Schmidt, H. A., von Haeseler, A. & Minh, B. Q. IQ-TREE: A Fast and  
952 Effective Stochastic Algorithm for Estimating Maximum-Likelihood Phylogenies. *Mol.*  
953 *Biol. Evol.* **32**, 268–274 (2015).
- 954 70. Kalyaanamoorthy, S., Minh, B. Q., Wong, T. K. F., von Haeseler, A. & Jermini, L. S.  
955 ModelFinder: fast model selection for accurate phylogenetic estimates. *Nat. Methods* **14**,  
956 587–589 (2017).
- 957 71. Stamatakis, A. RAxML version 8: a tool for phylogenetic analysis and post-analysis of  
958 large phylogenies. *Bioinformatics* **30**, 1312–1313 (2014).
- 959 72. Yang, Z. Maximum likelihood phylogenetic estimation from DNA sequences with  
960 variable rates over sites: Approximate methods. *J. Mol. Evol.* **39**, 306–314 (1994).
- 961 73. Yang, Z. Among-site rate variation and its impact on phylogenetic analyses. *Trends Ecol.*  
962 *Evol.* **11**, 367–372 (1996).
- 963 74. Tavaré, S. Some probabilistic and statistical problems in the analysis of DNA sequences.

- 964        *Lect. Math. life Sci.* **17**, 57–86 (1986).
- 965    75.    Vinet, L. & Zhedanov, A. A ‘missing’ family of classical orthogonal polynomials. *J. Phys.*  
966        *A Math. Theor.* **44**, 085201 (2011).
- 967    76.    Jones, D. T., Taylor, W. R. & Thornton, J. M. The rapid generation of mutation data  
968        matrices from protein sequences. *Bioinformatics* **8**, 275–282 (1992).
- 969    77.    Le, S. Q. & Gascuel, O. An Improved General Amino Acid Replacement Matrix. *Mol.*  
970        *Biol. Evol.* **25**, 1307–1320 (2008).
- 971    78.    Kosiol, C. & Goldman, N. Different Versions of the Dayhoff Rate Matrix. *Mol. Biol. Evol.*  
972        **22**, 193–199 (2005).
- 973    79.    Zhou, X., Shen, X.-X., Hittinger, C. T. & Rokas, A. Evaluating Fast Maximum  
974        Likelihood-Based Phylogenetic Programs Using Empirical Phylogenomic Data Sets. *Mol.*  
975        *Biol. Evol.* **35**, 486–503 (2018).
- 976    80.    Chernomor, O., von Haeseler, A. & Minh, B. Q. Terrace Aware Data Structure for  
977        Phylogenomic Inference from Supermatrices. *Syst. Biol.* **65**, 997–1008 (2016).
- 978    81.    Waddell, P. J. & Steel, M. . General Time-Reversible Distances with Unequal Rates  
979        across Sites: Mixing  $\Gamma$  and Inverse Gaussian Distributions with Invariant Sites. *Mol.*  
980        *Phylogenet. Evol.* **8**, 398–414 (1997).
- 981    82.    Felsenstein, J. The Newick tree format. *English* (1986).
- 982    83.    Felsenstein, J. Inferring phylogenies. *Sunderland* (2003).
- 983    84.    Hoang, D. T., Chernomor, O., von Haeseler, A., Minh, B. Q. & Vinh, L. S. UFBoot2:  
984        Improving the Ultrafast Bootstrap Approximation. *Mol. Biol. Evol.* **35**, 518–522 (2018).
- 985    85.    Vinh, L. S. IQPNNI: Moving Fast Through Tree Space and Stopping in Time. *Mol. Biol.*  
986        *Evol.* **21**, 1565–1571 (2004).

- 987 86. Minh, B. Q., Vinh, L. S., von Haeseler, A. & Schmidt, H. A. pIQPNNI: parallel  
988 reconstruction of large maximum likelihood phylogenies. *Bioinformatics* **21**, 3794–3796  
989 (2005).
- 990 87. Kishino, H., Miyata, T. & Hasegawa, M. Maximum likelihood inference of protein  
991 phylogeny and the origin of chloroplasts. *J. Mol. Evol.* **31**, 151–160 (1990).
- 992 88. Hasegawa, M. & Kishino, H. Accuracies of the simple methods for estimating the  
993 bootstrap probability of a maximum likelihood tree. *Mol. Biol. Evol.* **11**, 142–145 (1994).
- 994 89. Stamatakis, A., Hoover, P. & Rougemont, J. A Rapid Bootstrap Algorithm for the  
995 RAxML Web Servers. *Syst. Biol.* **57**, 758–771 (2008).
- 996 90. Felsenstein, J. Confidence Limits on Phylogenies: An Approach Using the Bootstrap.  
997 *Evolution (N. Y.)* **39**, 783 (1985).
- 998 91. R Development Core Team, R. *Computational Many-Particle Physics. R Foundation for*  
999 *Statistical Computing* **739**, (Springer Berlin Heidelberg, 2008).
- 1000 92. Lê, S., Josse, J. & Husson, F. FactoMineR : An R Package for Multivariate Analysis. *J.*  
1001 *Stat. Softw.* **25**, 1–18 (2008).
- 1002 93. Kassambara, A. & Mundt, F. factoextra. *R package, v. 1.0.5*  
1003 <http://www.sthda.com/english/rpkgs/factoextra/> (2017).
- 1004 94. Zhou, X. *et al.* Quartet-based computations of internode certainty provide accurate and  
1005 robust measures of phylogenetic incongruence. *bioRxiv* 168526 (2017).  
1006 doi:10.1101/168526
- 1007 95. Junier, T. & Zdobnov, E. M. The Newick utilities: high-throughput phylogenetic tree  
1008 processing in the UNIX shell. *Bioinformatics* **26**, 1669–1670 (2010).
- 1009 96. Yang, Z. PAML 4: Phylogenetic Analysis by Maximum Likelihood. *Mol. Biol. Evol.* **24**,



- 1010 1586–1591 (2007).
- 1011 97. DOS REIS, M. & YANG, Z. The unbearable uncertainty of Bayesian divergence time  
1012 estimation. *J. Syst. Evol.* **51**, 30–43 (2013).
- 1013 98. Liu, L. *et al.* Genomic evidence reveals a radiation of placental mammals uninterrupted by  
1014 the KPg boundary. *Proc. Natl. Acad. Sci.* **114**, E7282–E7290 (2017).
- 1015 99. Hedges, S. B., Dudley, J. & Kumar, S. TimeTree: A public knowledge-base of divergence  
1016 times among organisms. *Bioinformatics* **22**, 2971–2972 (2006).
- 1017 100. Berbee, M. L. & Taylor, J. W. in *The Mycota* 229–246 (2001).
- 1018 101. Vijaykrishna, D., Jeewon, R. & Hyde, K. Molecular taxonomy, origins and evolution of  
1019 freshwater ascomycetes. *Fungal Divers.* **23**, 351–390 (2006).
- 1020 102. Sharpton, T. J. *et al.* Comparative genomic analyses of the human fungal pathogens  
1021 Coccidioides and their relatives. *Genome Res.* **19**, 1722–1731 (2009).
- 1022 103. Da Lage, J.-L., Binder, M., Hua-Van, A., Janeček, Š. & Casane, D. Gene make-up: rapid  
1023 and massive intron gains after horizontal transfer of a bacterial  $\alpha$ -amylase gene to  
1024 Basidiomycetes. *BMC Evol. Biol.* **13**, 40 (2013).
- 1025 104. Kensche, P. R., Oti, M., Dutilh, B. E. & Huynen, M. A. Conservation of divergent  
1026 transcription in fungi. *Trends Genet.* **24**, 207–211 (2008).
- 1027 105. Beimforde, C. *et al.* Estimating the Phanerozoic history of the Ascomycota lineages:  
1028 Combining fossil and molecular data. *Mol. Phylogenet. Evol.* **78**, 386–398 (2014).
- 1029 106. Fan, H.-W. *et al.* Genomic Analysis of an Ascomycete Fungus from the Rice Planthopper  
1030 Reveals How It Adapts to an Endosymbiotic Lifestyle. *Genome Biol. Evol.* **7**, 2623–2634  
1031 (2015).
- 1032 107. Gaya, E. *et al.* The adaptive radiation of lichen-forming Teloschistaceae is associated with

- 1033            sunscreens pigments and a bark-to-rock substrate shift. *Proc. Natl. Acad. Sci.* **112**,  
1034            11600–11605 (2015).
- 1035    108. Raftery, A. E. & Lewis, S. M. The number of iterations, convergence diagnostics and  
1036            generic Metropolis algorithms. *Pract. Markov Chain Monte Carlo* **7**, 763–773 (1995).
- 1037    109. Sedgwick, P. Spearman’s rank correlation coefficient. *BMJ* **349**, g7327–g7327 (2014).
- 1038    110. Harrell Jr, F. E. Package ‘Hmisc’ (v4.0-0). URL [https://cran.r-](https://cran.r-project.org/web/packages/Hmisc/index.html)  
1039            *project.org/web/packages/Hmisc/index.html* (2015).
- 1040    111. Wickham, H. *ggplot2. Elegant Graphics for Data Analysis* (Springer New York, 2009).  
1041            doi:10.1007/978-0-387-98141-3
- 1042    112. Conway, J. R., Lex, A. & Gehlenborg, N. UpSetR: an R package for the visualization of  
1043            intersecting sets and their properties. *Bioinformatics* **33**, 2938–2940 (2017).
- 1044    113. Kolde, R. Package ‘pheatmap’. *Bioconductor* 1–6 (2012).
- 1045    114. Rambaut, A. FigTree, a graphical viewer of phylogenetic trees. *Inst. Evol. Biol. Univ.*  
1046            *Edinburgh* (2009).
- 1047    115. Bell, M. A. & Lloyd, G. T. strap: an R package for plotting phylogenies against  
1048            stratigraphy and assessing their stratigraphic congruence. *Palaeontology* **58**, 379–389  
1049            (2015).
- 1050    116. Kocsubé, S. *et al.* Aspergillus is monophyletic: Evidence from multiple gene phylogenies  
1051            and extrolites profiles. *Stud. Mycol.* **85**, 199–213 (2016).
- 1052    117. Cary, J. W., Ehrlich, K. C., Beltz, S. B., Harris-Coward, P. & Klich, M. A.  
1053            Characterization of the *Aspergillus ochraceoroseus* aflatoxin/sterigmatocystin biosynthetic  
1054            gene cluster. *Mycologia* **101**, 352–362 (2009).
- 1055    118. Moore, G. G., Mack, B. M. & Beltz, S. B. Draft Genome Sequences of Two Closely

- 1056            Related Aflatoxigenic *Aspergillus* Species Obtained from the Ivory Coast. *Genome Biol.*  
1057            *Evol.* **8**, 729–732 (2016).
- 1058    119.    Frisvad, J. C., Skouboe, P. & Samson, R. A. Taxonomic comparison of three different  
1059            groups of aflatoxin producers and a new efficient producer of aflatoxin B1,  
1060            sterigmatocystin and 3-O-methylsterigmatocystin, *Aspergillus rambellii* sp. nov. *Syst.*  
1061            *Appl. Microbiol.* **28**, 442–453 (2005).
- 1062    120.    Endo, A., Kuroda, M. & Tsujita, Y. ML-236A, ML-236B, and ML-236C, new inhibitors  
1063            of cholesterologenesis produced by *Penicillium citrinum*. *J. Antibiot. (Tokyo)*. **29**, 1346–1348  
1064            (1976).
- 1065    121.    Degnan, J. H. & Salter, L. A. Gene tree distributions under the coalescent process.  
1066            *Evolution (N. Y.)*. **59**, 24–37 (2005).
- 1067    122.    Sang, T. & Zhong, Y. Testing Hybridization Hypotheses Based on Incongruent Gene  
1068            Trees. *Syst. Biol.* **49**, 422–434 (2000).
- 1069    123.    Hallett, M., Lagergren, J. & Tofigh, A. Simultaneous identification of duplications and  
1070            lateral transfers. in *Proceedings of the eighth annual international conference on*  
1071            *Computational molecular biology - RECOMB '04* 347–356 (ACM Press, 2004).  
1072            doi:10.1145/974614.974660
- 1073    124.    Doolittle, W. F. & Baptiste, E. Pattern pluralism and the Tree of Life hypothesis. *Proc.*  
1074            *Natl. Acad. Sci.* **104**, 2043–2049 (2007).
- 1075    125.    Castoe, T. A. *et al.* Evidence for an ancient adaptive episode of convergent molecular  
1076            evolution. *Proc. Natl. Acad. Sci.* **106**, 8986–8991 (2009).
- 1077    126.    Li, Y., Liu, Z., Shi, P. & Zhang, J. The hearing gene *Prestin* unites echolocating bats and  
1078            whales. *Curr. Biol.* **20**, R55–R56 (2010).

- 1079 127. Patterson, N., Richter, D. J., Gnerre, S., Lander, E. S. & Reich, D. Genetic evidence for  
1080 complex speciation of humans and chimpanzees. *Nature* **441**, 1103–1108 (2006).
- 1081 128. Hobolth, A., Christensen, O. F., Mailund, T. & Schierup, M. H. Genomic Relationships  
1082 and Speciation Times of Human, Chimpanzee, and Gorilla Inferred from a Coalescent  
1083 Hidden Markov Model. *PLoS Genet.* **3**, e7 (2007).
- 1084 129. Martin, S. H. *et al.* Genome-wide evidence for speciation with gene flow in *Heliconius*  
1085 butterflies. *Genome Res.* **23**, 1817–1828 (2013).
- 1086 130. Phillips, M. J., Delsuc, F. & Penny, D. Genome-Scale Phylogeny and the Detection of  
1087 Systematic Biases. *Mol. Biol. Evol.* **21**, 1455–1458 (2004).
- 1088 131. Nabhan, A. R. & Sarkar, I. N. The impact of taxon sampling on phylogenetic inference: a  
1089 review of two decades of controversy. *Brief. Bioinform.* **13**, 122–134 (2012).
- 1090 132. Rokas, A. & Carroll, S. B. More Genes or More Taxa? The Relative Contribution of Gene  
1091 Number and Taxon Number to Phylogenetic Accuracy. *Mol. Biol. Evol.* **22**, 1337–1344  
1092 (2005).
- 1093 133. Baldauf, S. L. Phylogeny for the faint of heart: a tutorial. *Trends Genet.* **19**, 345–351  
1094 (2003).
- 1095

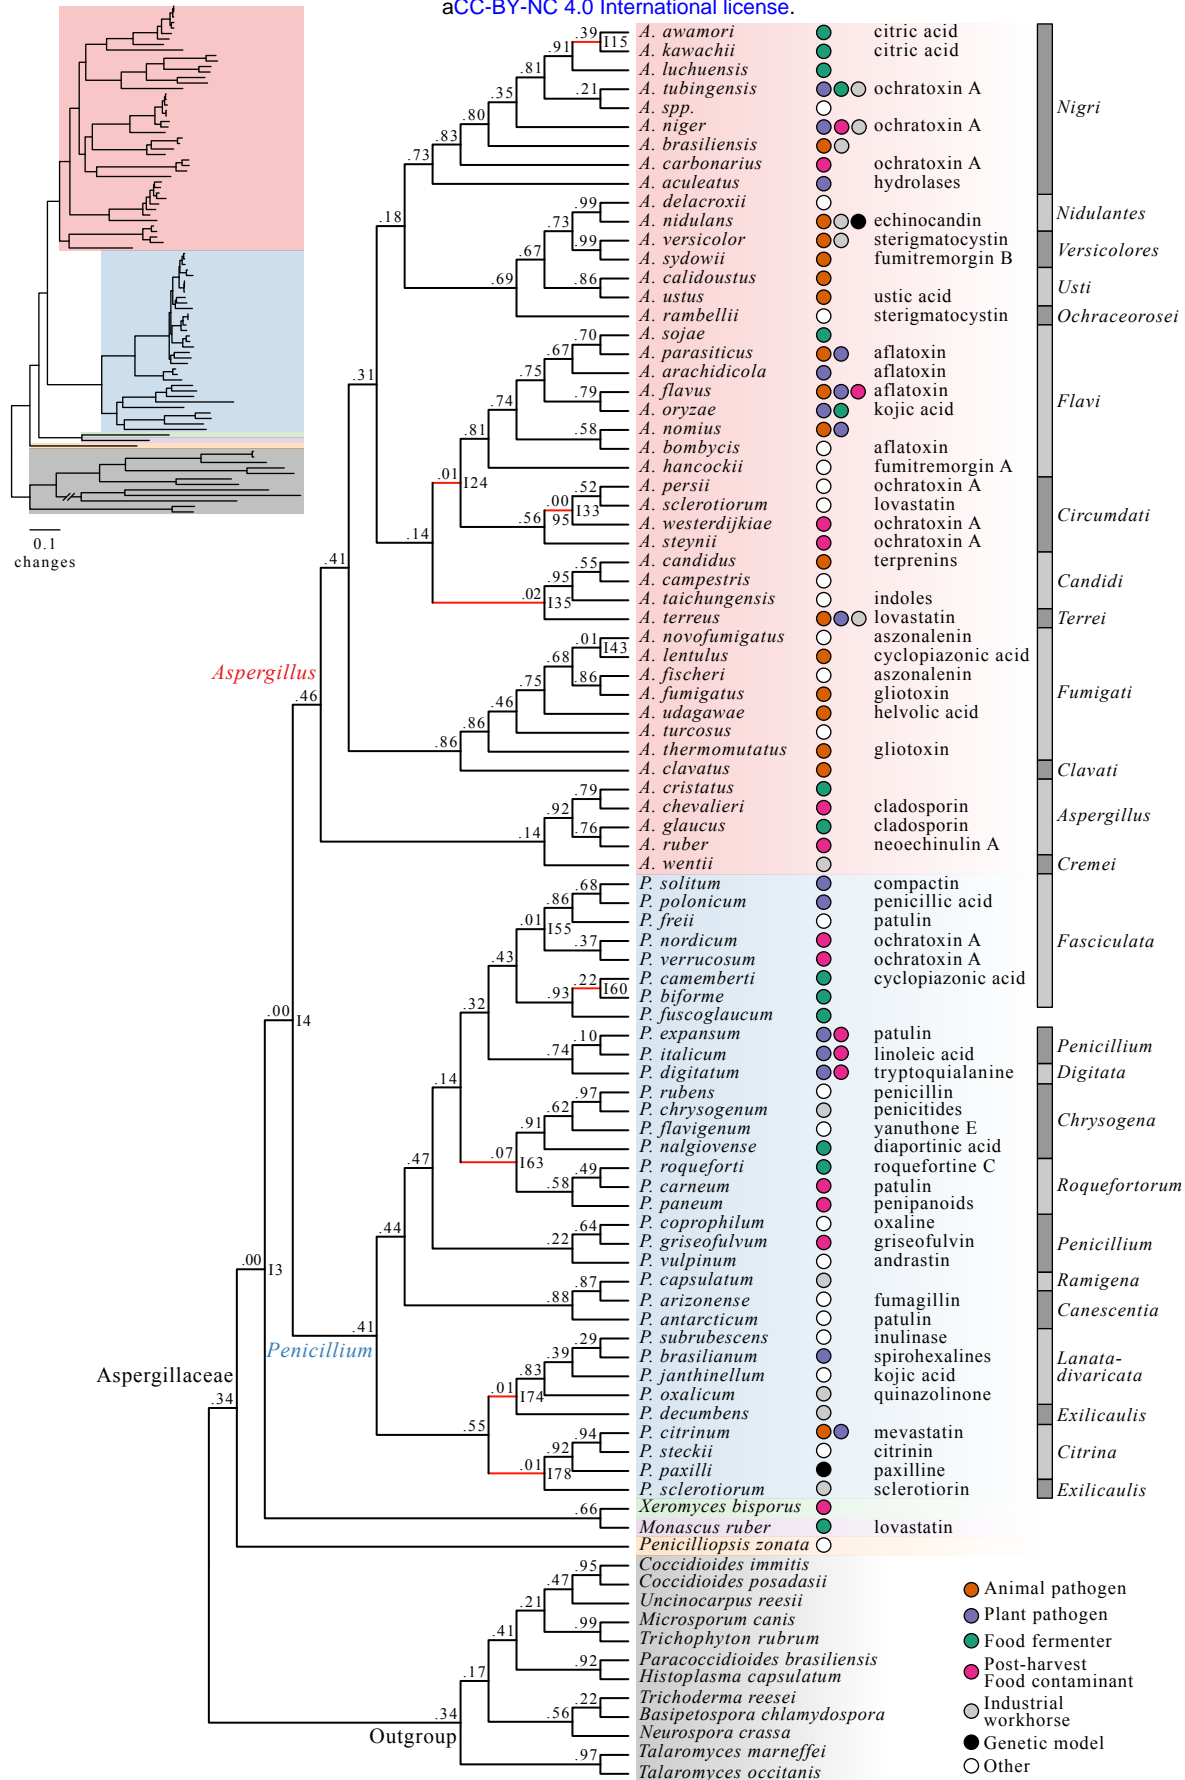



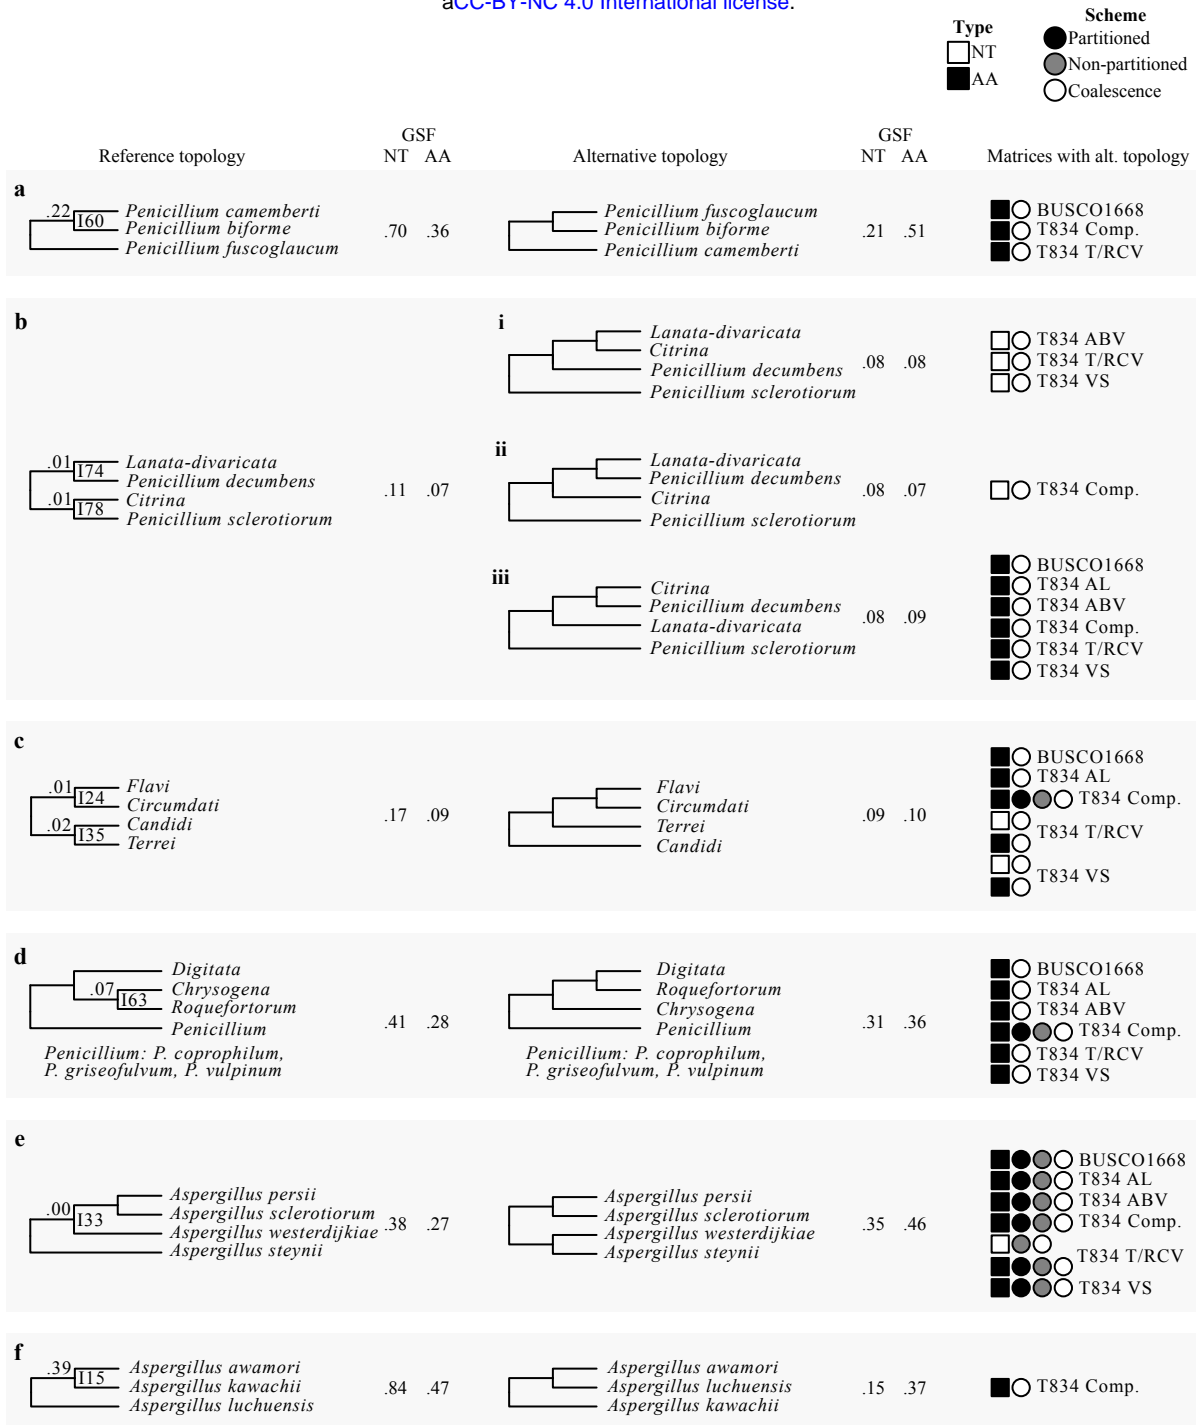

**Type**  
 NT  
 AA

**Scheme**  
 Partitioned  
 Non-partitioned  
 Coalescence

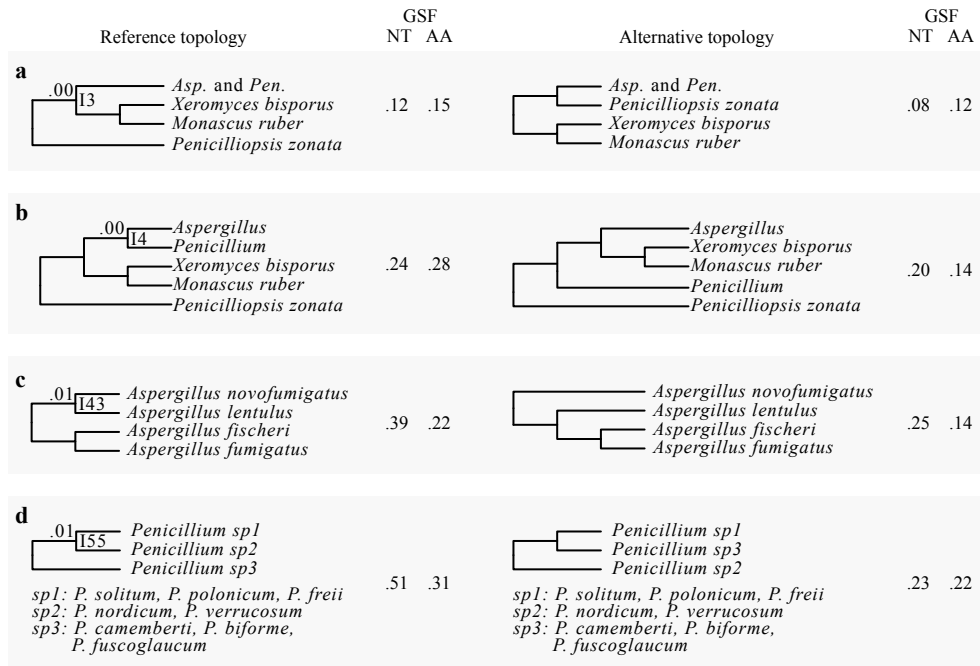



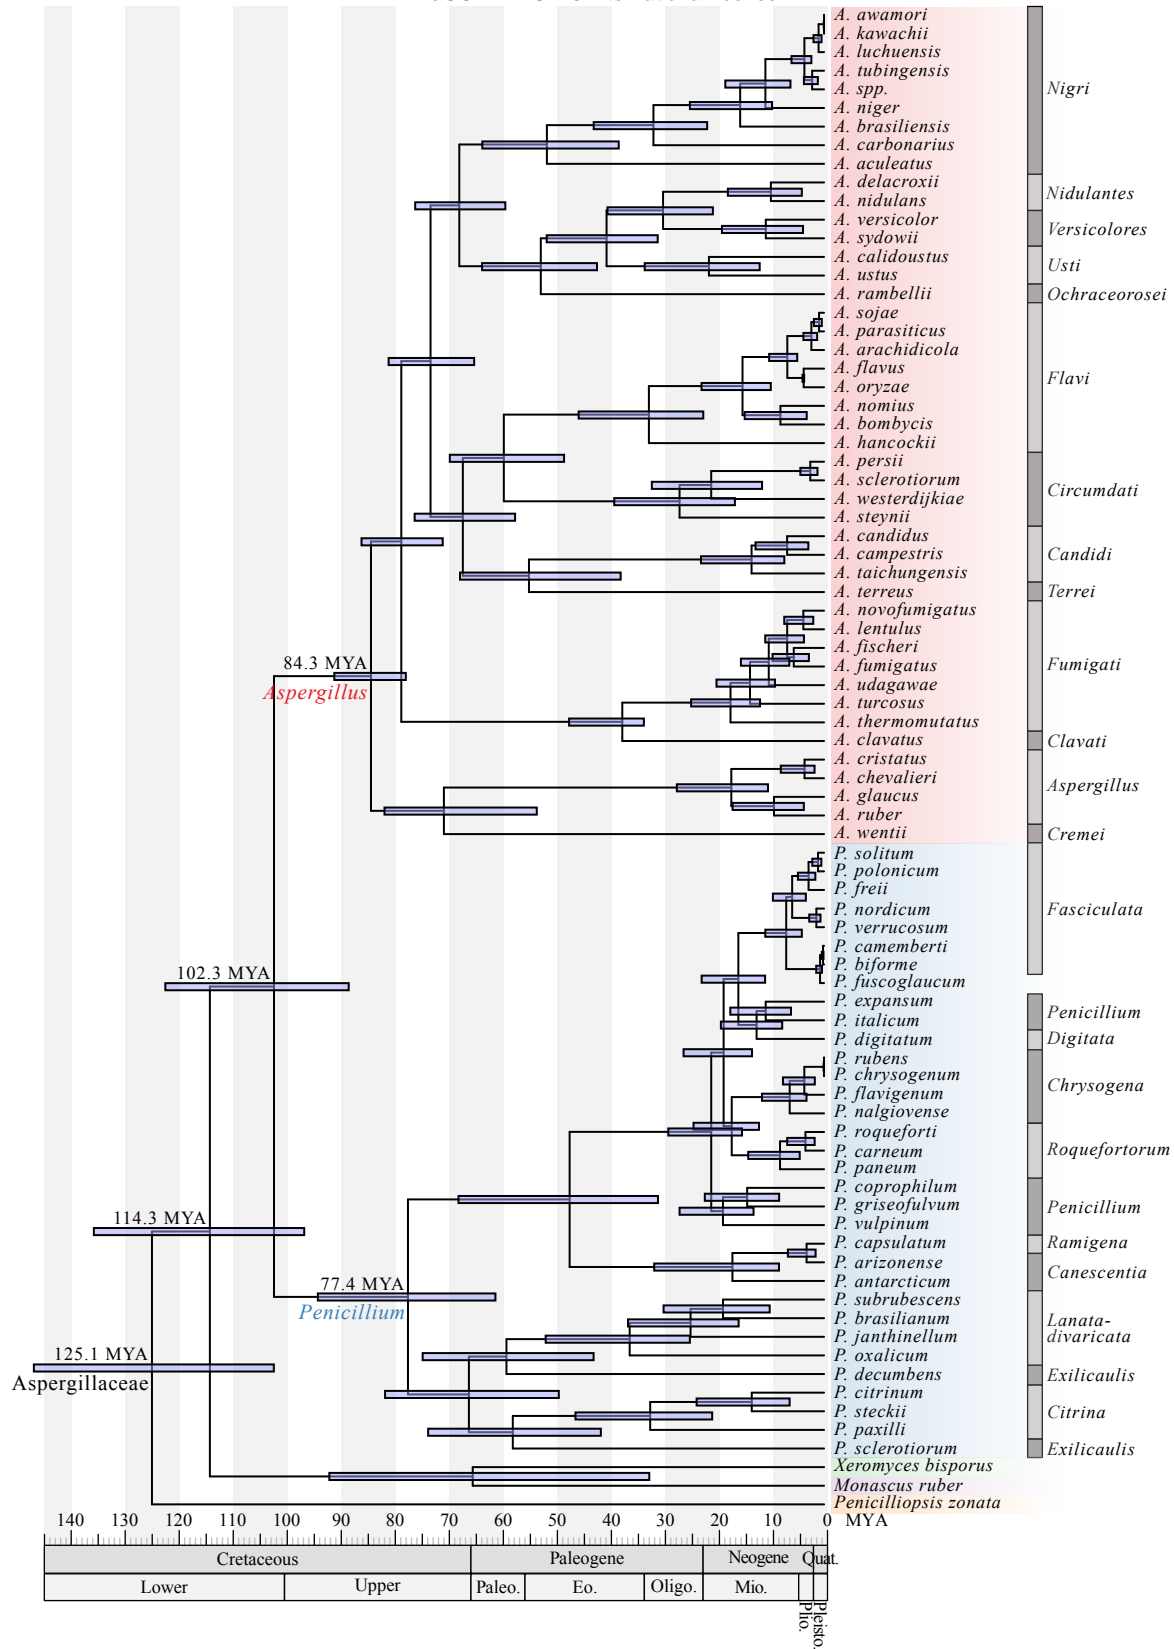

Source: https://www.biorxiv.org/content/10.1101/370429v1.full.pdf
